1 **Phylogenomics within the Anthonotha clade (Detarioideae, Leguminosae) reveals a high**  
2 **diversity in floral trait shifts and a general trend towards organ number reduction**

3  
4 Dario I. Ojeda<sup>1,2,6\*</sup>, Erik Koenen<sup>3</sup>, Sandra Cervantes<sup>1</sup>, Manuel de la Estrella<sup>4,5</sup>, Eulalia Banguera-  
5 Hinstroza<sup>6</sup>, Steven B. Janssens<sup>7</sup>, Jeremy Migliore<sup>6</sup>, Boris Demenou<sup>6</sup>, Anne Bruneau<sup>8</sup>, Félix Forest<sup>4</sup>  
6 and Olivier J. Hardy<sup>6</sup>

7  
8 <sup>1</sup>Department of Ecology and Genetics, University of Oulu, PO Box 3000,  
9 Oulu FIN-90014, Finland

10 <sup>2</sup>Norwegian Institute of Bioeconomy Research, 1430 Ås, Norway

11 <sup>3</sup>Institute of Systematic Botany, University of Zurich, Zürich, Switzerland

12 <sup>4</sup>Comparative Plant and Fungal Biology Department, Royal Botanical Gardens, Kew, Richmond,  
13 TW9 3DS, UK

14 <sup>5</sup>Departamento de Botánica, Ecología y Fisiología Vegetal, Facultad de Ciencias, Campus de  
15 Rabanales, Universidad de Córdoba, 14071, Córdoba, Spain

16 <sup>6</sup>Evolutionary Biology and Ecology Unit, CP 160/12, Faculté des Sciences, Université Libre de  
17 Bruxelles, Av. F. D. Roosevelt 50, B-1050 Brussels, Belgium

18 <sup>7</sup>Botanic Garden Meise, Nieuwelaan 38, BE-1860 Meise, Belgium

19 <sup>8</sup>Institut de recherche en biologie végétale and Département de Sciences Biologiques, Université de  
20 Montréal, 4101 Sherbrooke est, Montréal, QC H1X 2B2, Canada

21

22

23

24

25

26

27

28

29 \* Corresponding author: [dario.alayon@gmail.com](mailto:dario.alayon@gmail.com), Tel: +47 47633227

30 **Abstract**

31 Detarioideae is well known for its high diversity of floral traits, including flower symmetry, number  
32 of organs, and petal size and morphology. This diversity has been characterized and studied at higher  
33 taxonomic levels, but limited analyses have been performed among closely related genera with  
34 contrasting floral traits due to the lack of fully resolved phylogenetic relationships. Here, we used  
35 four representative transcriptomes to develop an exome capture bait for the entire subfamily and  
36 applied it to the Anthonotha clade using a complete data set (61 specimens) representing all extant  
37 floral diversity. Our phylogenetic analyses recovered congruent topologies using ML and Bayesian  
38 methods. The genus *Anthonotha* was recovered as monophyletic contrary to the remaining three  
39 genera (*Englerodendron*, *Isomacrolobium* and *Pseudomacrolobium*), which form a monophyletic  
40 group sister to *Anthonotha*. We inferred a total of 35 transitions for the seven floral traits (pertaining  
41 to flower symmetry, petals, stamens and staminodes) that we analyzed, suggesting that at least 30%  
42 of the species in this group display transitions from the ancestral condition reconstructed for the  
43 *Anthonotha* clade. The main transitions were towards a reduction in the number of organs (petals,  
44 stamens and staminodes). Despite the high number of transitions, our analyses indicate that the seven  
45 characters are evolving independently in these lineages. Petal morphology is the most labile floral  
46 trait with a total of seven independent transitions in number and seven independent transitions to  
47 modification in petal types. The diverse petal morphology along the dorsoventral axis of symmetry  
48 within the flower is not associated with differences at the micromorphology of petal surface,  
49 suggesting that in this group all petals within the flower might possess the same petal identity at the  
50 molecular level. Our results provide a solid evolutionary framework for further detailed analyses of  
51 the molecular basis of petal identity.

52

53

54

55

56

57

58 **Key words:** Berlinia clade, flower evolution, papillose conical cells, petal number, petal identity,  
59 phylogenomics, target enrichment.

## 60 **1. Introduction**

### 61 **1.1. Flower diversity in the Detarioideae and the Anthonotha clade**

62 Legumes are well known for their diversity in flower morphology. The group has diversified into  
63 a diverse array of flower arrangements, flower symmetry and number of organs within each of the  
64 whorls (Tucker, 2003). The best known flower arrangement in legumes (the papilionoid or “pea-like”  
65 flower) with distinctive petal types arranged along the dorsoventral axis of the flower is characteristic  
66 of most taxa within subfamily Papilionoideae. This arrangement consists of an adaxial petal (also  
67 referred to as dorsal, banner or standard petal), two lateral petals (wings), and two abaxial petals (also  
68 known as ventral or keel) (LPWG, 2017). This flower arrangement is considered highly specialized  
69 and its coevolution with bees is suggested as one of the drivers of diversification in this group (Cronk  
70 and Moller, 1997). Most of our current knowledge on flower evolution and its molecular basis has  
71 been centered in this subfamily. The remaining five subfamilies have also evolved diverse arrays of  
72 flower diversity in relation to a diverse range of pollinators (Banks and Rudall, 2016; Bruneau et al.,  
73 2014; Tucker, 2003; Zimmerman et al., 2017).

74 The pantropical subfamily Detarioideae comprises 81 genera and ca. 760 species, with its highest  
75 diversity in tropical Africa and Madagascar (58% of species) (de la Estrella et al., 2018, 2017). The  
76 group contains large trees of ecological importance in tropical environments (e.g. the Miombo forest  
77 in east Africa) (Ryan et al., 2016), but also several species of economic importance as food source,  
78 timber, oils, resins, as well as ornamentals (Langenheim, 2003). Detarioideae is well known for its  
79 high level of flower diversity, regarding for example the symmetry, floral arrangement and size, and  
80 number of organs per whorl (LPWG, 2017). The entire range of floral diversity encountered in  
81 present-day legumes, with the notable exception of the specialized papilionoid flower, is  
82 encompassed in this subfamily (Bruneau et al., 2014). This diversity is also visible at the flower  
83 developmental (ontogeny) level, where the final number and arrangement of floral organs at anthesis  
84 is achieved via alternative mechanisms (Bruneau et al., 2014; Tucker, 2002a, 2000). The plasticity of  
85 some of these floral traits has been documented at multiple levels, among major lineages, between  
86 closely related genera (Bruneau et al., 2014) and within species (Tucker, 2002a, 2002b).

87 One of the most extreme cases of variation of floral traits within Detarioideae (e.g. petal and  
88 stamen numbers) is reported in the *Berlinia* clade, where plasticity of these traits is observed within  
89 the same species and within flowers of the same individual (Breteler, 2011, 2010, 2008). In addition  
90 to the diversity in organ number (merism), the *Berlinia* clade also displays variation in petal size and

91 arrangements within the dorsoventral axis of the flower. Most genera display a large adaxial (dorsal)  
92 petal in the flower (e.g. *Gilbertiodendron* and *Berlinia* Fig. 1A and D) with additional lateral and  
93 abaxial (ventral) petals of different size and shape (Bruneau et al., 2014; de la Estrella and Devesa,  
94 2014a; LPWG, 2017; Mackinder and Pennington, 2011). Within the *Berlinia* clade, the *Anthonotha*  
95 clade, which comprises a group of three closely related genera with contrasting flower symmetry, is  
96 particularly diverse in its flower morphology. Some species of *Anthonotha* (Fig. 1G) and  
97 *Isomacrolobium* (Fig. 1F) display modifications in petal arrangement, whereby the dorsal, lateral and  
98 abaxial petals all possess a different morphology, or where the adaxial and lateral petals possess the  
99 same morphology while the abaxial one has a unique morphology. In contrast, in *Englerodendron*  
100 (Fig. 1E), a genus of four species with actinomorphic (radial symmetry) flowers (Breteler, 2006), all  
101 petals have the same morphology, and they resemble either the adaxial or the lateral petals of the  
102 zygomorphic and closely related *Anthonotha* and *Isomacrolobium*. These differences in petal size and  
103 morphology along the dorsoventral axis of the flower might suggest distinct petal identities at the  
104 molecular level, but this remains to be tested.

105

## 106 **1.2 The molecular basis of petal identity and its association with petal micromorphology**

107 The molecular basis of the of petal identity has been well characterized in papilionoids, where  
108 specific transcription factors of *CYCLOIDEA* have been identified in *Lotus* (Feng et al., 2006; Wang  
109 et al., 2010; Xu et al., 2013) and *Pisum* (Wang et al., 2008). In these two genera, the differences in  
110 petal shape along the dorsoventral axis and petal symmetry reflect differences in gene expression  
111 domains of three copies of *CYCLOIDEA*. This results in three domains of identity: adaxial (dorsal),  
112 lateral and abaxial (ventral) identities. These domains of identity within the flower are also reflected  
113 at the micromorphological level on each petal, where specific epidermal types are associated with  
114 each petal identity (Feng et al., 2006; Ojeda et al., 2012, 2009). For instance, the dorsal petal identity  
115 is conferred by the activity of two copies of *CYCLOIDEA* (*LjCYC2* and *LjCYC1*) in *Lotus japonicus*  
116 L. and the petal surface is characterized by papillose conical cells (PCS) (Feng et al., 2006; Xu et al.,  
117 2013). However, these molecular analyses have been concentrated in the Papilionoideae and there is  
118 a lack of understanding of the molecular basis of petal identity in the other subfamilies of the  
119 Leguminosae. The characterization of petal micromorphology and its relation to petal identity also  
120 has been focused mainly on the Papilionoideae. Only two Detarioideae genera (*Brownea*,  
121 *Tamarindus*) have been analyzed to date (Ojeda et al., 2009) and neither showed micromorphological  
122 differentiation among petal types. However, it is unclear whether this lack of micromorphological

123 differentiation applies more generally to other members of this subfamily. Other subfamilies are  
124 poorly represented in our understanding of floral genetics in legumes and with this study we hope to  
125 bring awareness of the potential use of the Detarioideae as a “model clade” (Chanderbali et al., 2016)  
126 to further improve our understanding of flower evolution in Leguminosae.

127

### 128 **1.3 Phylogenetic relationships of *Anthonotha* and closely related genera in the Berlinia clade**

129 The Berlinia clade (tribe Amherstieae) (de la Estrella et al., 2018) as circumscribed by Bruneau  
130 et al (2008) comprises 17 genera and some ca. 180 species that occur exclusively in Africa. Previous  
131 studies based on morphology and a few molecular markers have identified major lineages within this  
132 group, e.g. the “babjit” group (Wieringa, 1999), which also has been recovered in more recent  
133 phylogenetic analyses (de la Estrella et al., 2018, 2014). However, generic relationships have not  
134 been fully resolved and a limited number of species have been included for most genera within the  
135 Berlinia clade in previous studies (Bruneau et al., 2008; de la Estrella et al., 2014; Mackinder et al.,  
136 2013). Within the Berlinia clade, the genus *Anthonotha* and its two close relatives, *Isomacrolobium*  
137 and *Englerodendron*, is potentially the most problematic group that remains to be studied because  
138 several studies have suggested *Anthonotha* might not be monophyletic (Breteler, 2008). The most  
139 recent taxonomic analyses of the *Anthonotha* clade have been entirely based on morphological data,  
140 and it is not clear whether the morphological traits used to circumscribe these genera reflect  
141 monophyletic lineages (Breteler, 2011, 2010, 2008, 2006; van der Burgt et al., 2007). Despite the  
142 remarkable flower diversity among the 17 genera of the Berlinia clade, and in particular within the  
143 *Anthonotha* clade, the lack of phylogenetic resolution at the generic level found in previous studies  
144 has hampered in-depth analyses of floral evolution. In order to better resolve relationships among  
145 closely related genera within Detarioideae, as well as within genus, we developed a target enrichment  
146 (exome capture) for the entire subfamily by selecting orthologues shared among four representative  
147 transcriptomes. We combined the design of this capture bait set with a complete sampling of  
148 *Anthonotha* and its closely related genera, representing a group of ca. 35 species with high diversity  
149 in floral traits.

150

### 151 **1.4 Objectives of this study**

152 The aims of this study were to: 1) reconstruct the relationships of *Anthonotha* and its most  
153 closely related genera (*Isomacrolobium* and *Englerodendron*) within the Berlinia clade using a  
154 complete sampling representing all extant floral diversity, 2) determine the ancestral states of seven

155 of the most labile floral traits within the Anthonotha clade and identify major transitions from the  
156 ancestral floral state reconstructed, 3) test for correlations in the evolution of the floral traits  
157 investigated in this group, and 4) establish whether changes in petal morphology and position within  
158 the dorsoventral axis of the flower are associated with differences in petal identity, as measured by  
159 differences in petal surface micromorphology.

160

## 161 **2. Materials and methods**

### 162 **2.1 Selection of species and transcriptome sequencing**

163 For the transcriptome analysis, we selected four species (*Anthonotha fragans* (Baker f.) Exell &  
164 Hillc., *Afzelia bella* Harms, *Copaifera officinalis* (Jacq.) L., and *Prioria balsamifera* (Vermoesen)  
165 Breteler) representing the major clades within Detarioideae (de la Estrella et al., 2018). Three were  
166 generated in this study and the fourth was obtained from a previous study on *Copaifera officinalis*  
167 Jacq. (Matasci et al., 2014). For each species we collected young leaves from seedlings growing  
168 under nursery conditions. RNA was extracted using the Pure Link™ Plant RNA Reagent (Invitrogen)  
169 following the manufacturer's protocol with DNase I Amp grade (Invitrogen). RNA quantity and  
170 quality were checked using a Qubit<sup>R</sup> 2.0 Invitrogen (Life Technologies) and with an agarose gel at  
171 2%, respectively. Each sample was later enriched for mRNA using the NEXTflex™ Poly(A) bead  
172 capture (BioScientific). RNA libraries were prepared for each species with the NEXTflex™ Rapid  
173 Directional RNA-seq kit following the manufacturer's protocol and ~25 million reads (150 bp paired  
174 end sequences) were generated per library on a NextSeq Illumina sequencer at GIGA (Grappe  
175 Interdisciplinaire de Génoprotéomique Appliquée) at the Université de Liège. Raw reads were first  
176 analyzed with FastQC (<http://www.bioinformatics.bbsrc.ac.uk/projects/fastqc>) and later cleaned with  
177 Trimmomatic v. 0.36 (Bolger et al., 2014) with settings ILLUMINA\_CLIP:TruSeq3-PE.fa:20:30:10  
178 LEADING:3 TRAILING:3 SLIDINGWINDOW:4:15 MINLEN:36. Trinity v. 2.2 (Grabherr et al.,  
179 2011) was used for *de novo* assembly using the default parameters. Raw reads for each species were  
180 assembled separately. Transcriptome assembly statistics and quality were assessed with rnaQUAST  
181 v. 1.4 (Bushmanova et al., 2016). To assess completeness of the transcriptomes, the Benchmarking  
182 Universal Single-Copy Orthologs (BUSCO ver. 2) was run on each species separately using the  
183 embryophyta odb9 database (Simão et al., 2015). Statistics of the four assemblies are described on  
184 Table S1. Fastq sequences from the three transcriptomes are deposited in the NCBI Bioproject  
185 PRJNA472454 (SUB4060777, SUB4060776, SUB4060712).

186

## 187 2.2. Target loci selection and bait design

188 For each species we identified open reading frames (ORFs) in the assembled transcriptome  
189 contigs using TransDecoder v2.1.0 (Haas et al., 2013) with default parameters. Coding regions with  
190 at least 100 amino acids were first predicted and extracted. An additional retention criteria search was  
191 used to retain ORFs with homology blasts on legumes using a BlastP search against a database  
192 containing the proteins from the complete genomes of six legume species (*Cajanus cajan* (L.)  
193 Millsp., *Cicer arietinum* L., *Glycine max* (L.) Merr., *Medicago truncatula* Gaertn., *Phaseolus*  
194 *vulgaris* Wall. and *Vigna radiata* (L.) R. Wilczek) (Data S1). We identified putatively single copy (or  
195 low copy number) genes with a CD-HIT (Li and Godzik, 2006) to cluster highly similar proteins  
196 within each species, followed by a SelfBLAST step to discard proteins with multiple hits. We later  
197 identified orthologues among the four transcriptomes using reciprocal best blast hits using a BlastP  
198 with a cut-off value of 1 -evalue 1e-10. We found from 32,129 to 46,510 ORFs with BlastP hits with  
199 the Pfam and the legume genomes (Table S1).

200 Selected orthologues were first aligned with MAFFT v.7 (Kato and Kuma, 2002) and trimmed  
201 with BMGE (Criscuolo and Gribaldo, 2010). Individual phylogenetic trees were reconstructed from  
202 each identified shared orthologue using RAxML v. 8.2.9 (Stamatakis, 2014) and only genes with a  
203 congruent topology to the known phylogenetic relationships among the four species were retained (de  
204 la Estrella et al., 2018, 2017). We generated two data sets, one with the recovered orthologues  
205 considering the four transcriptomes and the tree topology, and another set excluding *Afzelia bella*  
206 (with lowest number of contigs in the assembled transcriptomes). Orthologs with >80 % homology  
207 and at least 300 bp in length were selected from these two data sets. Putative intron/exon boundaries  
208 within these selected genes were predicted using the *A. fragans* assembled contigs as a reference and  
209 a database of three legume genomes (*M. truncatula*, *G. max* and *C. arietinum*) using a custom-made  
210 python script. Only exons >100 bp were retained along with the 5' and 3' UTR sequences attached to  
211 the exons of the flanking regions. Each exon was treated separately for bait design to prevent location  
212 of the baits in the intron/exon boundaries. We selected 289 target loci (genes), representing 1,058  
213 contigs with a total of 1,021 putative exons and a total size of 359,269 bp. The selected sequences  
214 were subjected to a RepeatMasker ([www.repeatmasker.org](http://www.repeatmasker.org)) analysis (Smit et al., 2015) using the  
215 Fabaceae repeats database from the Michigan State University Plant Repeat Databases  
216 (<http://plantrepeats.plantbiology.msu.edu/downloads.html>) with default settings. The probes were  
217 further *in silico* screened separately against both the *G. max* and *M. truncatula* genomes. Probes with  
218 soft-masking sequences and with non-unique hits in the two reference genomes were excluded from

219 the final bait design. The selected target regions were used to select orthologues and to develop a  
220 target enrichment bait suitable for the entire subfamily. The final set of genes selected were used to  
221 design an exome capture bait (Arbor Biosciences, MI, USA) with a 3x tiling of 120 bp RNA baits  
222 generating a total of 6,565 probes. This probe was applied to the Anthonotha clade, the focal group of  
223 our study, together with selected genera of the Berlinia clade.

224

### 225 **2.3 Taxon sampling**

226 The focal group of the study (Anthonotha clade) consists of c. 35 species currently classified  
227 based in morphology into four genera: *Anthonotha* (17 species), *Englerodendron* (4 species),  
228 *Isomacrobium* (12 species) and the monospecific *Pseudomacrobium* (*P. mengei* Hauman). Our  
229 sampling included 61 samples representing all species within the Anthonotha clade (except  
230 *Isomacrobium sargosii* (Pellegr.) Aubrév. & Pellegr. and *I. hallei* Aubrév.) (Table S2). This  
231 sampling included several individuals for widely distributed species and replicates for four species.  
232 In order to represent the closest genera of our focal group, we also included eight of the 17 genera  
233 within the Berlinia clade. These eight genera have been previously identified as the closest related  
234 lineages of our focal group (de la Estrella et al., 2018, 2017, 2014).

235

### 236 **2.4 DNA extraction, library preparation and hybridization**

237 Total genomic DNA was extracted from leaf tissue (25-35 mg) from herbarium specimens or  
238 silica gel samples (Table S2) using the CTAB modified protocol (Doyle and Doyle, 1987) and the  
239 QIAquick PCR Purification Kit (Qiagen, Venlo, Netherlands), followed by Qubit® 2.0 Fluorometer  
240 quantification (Life Technologies, Invitrogen, Foster City, USA). We used a modification of the cost-  
241 effective protocol for plastome capture for library preparation (Mariac et al., 2014). Briefly, DNA  
242 extracts were sheared using a Bioruptor® Pico (Diagenode SA., Liège, Belgium) to yield sonicated  
243 fragments of around ca. 400 bp. Sheared and sized DNA was then repaired and tagged using 6-bp  
244 barcodes for multiplexing all the samples (Rohland and Reich, 2012) after AMPure XP bead-based  
245 sample clean-up steps (Agencourt Bioscience, Beckman Coulter, Brea, USA). Hybrid enrichment  
246 was performed on pools of 48 samples per reaction following the MYbaits v 3.0.1 protocol, with 24 h  
247 of hybridization, a high stringency post-hybridization wash and a final amplification involving 17  
248 PCR cycles on a StepOnePlus (Applied Biosystems, Foster City, USA). Paired-end sequencing (2 ×  
249 150 bp) was performed on an Illumina NextSeq with reagent kit V2 at the GIGA platform (Liège,  
250 Belgium), assigning 400,000 million reads/sample.



## 251 **2.5 Assembly of captured sequences and recovery of orthologues**

252 Raw reads were first analyzed with FastQC and later cleaned with Trimmomatic v. 036 (Bolger  
253 et al., 2014) using the same conditions as described above. Reads were demultiplexed using the  
254 software Sabre (<https://github.com/najoshi/sabre>) and mapped to the bait reference using BWA with  
255 the bwa-mem algorithm (Li and Durbin, 2010). We then used Samtools (Li et al., 2009) and bedtools  
256 (Quinlan and Hall, 2010) on the mapped reads to determine capture success and coverage for each  
257 sample. Reads for each sample were later assembled *de novo* using SPAdes ver. 3.9 (Bankevich et  
258 al., 2012). We chose the genomic version of SPAdes (instead of maSPAdes), which reduces the  
259 number of isoforms on the assemblies. This assembler uses iterative k-mer lengths during the  
260 assembly allowing the reconstruction of contigs from the long reads (150 bp) we employed in this  
261 study. The contigs generated represent a consensus sequence of each captured region, thus indels and  
262 heterozygotes are not included, as the consensus sequence represents the most common allele. We  
263 used the cds and peptides of *A. fragans* reference (Data S2) and a custom-made Python script to  
264 select the corresponding contigs with significant hits (e-value  $1e^{-10}$ ) using Blast (Altschul et al., 1997)  
265 and Blat (Kent, 2002). We further identified orthologues on the selected contigs using the strategy  
266 developed by Yang and Smith (2014)  
267 ([https://bitbucket.org/yangya/phylogenomic\\_dataset\\_construction](https://bitbucket.org/yangya/phylogenomic_dataset_construction)).

268 Briefly, we reduced redundancy of cluster using CD-HIT (Li and Godzik, 2006) (99%, threshold,  
269 word size =10). After that we performed an all-by-all blast on all the samples and later filtered with a  
270 hit fraction cut-off of 0.5. We then used MCL (Van Dongen, 2000) with an inflation value of 1.4 to  
271 reduce identified clusters in the samples. Clusters with less than 1000 sequences were aligned with  
272 mafft (--genafpair --maxiterate 1000) (Kato and Kuma, 2002), 0.1 minimal column occupancy and  
273 tree inference was generated with RAxML v. 8.2.9 (Stamatakis, 2014). We used PASTA (Mirarab et  
274 al., 2015) for larger clusters, minimal column occupancy of 0.01 and trees were inferred using  
275 fasttree (Price et al., 2009). Paralog sequences were pruned using the strict 1to1 strategy (Yang and  
276 Smith, 2014), which searches for homolog sequences that are strictly one-to-one correspondence  
277 among samples. The concatenated alignment was visually inspected and formatted with AliView  
278 (Larsson, 2014) and summary statistics obtained using AMAS (Borowiec, 2016). Raw sequence  
279 reads are deposited in the NCBI SRA XXXXXX.

280

281

## 282 **2.6 Phylogenomic analysis using gene tree (individual orthologues) and supermatrix** 283 **(concatenation) approaches**

284 Phylogenetic analyses were performed using maximum likelihood approach (ML) as  
285 implemented in RAxML v. 8.2.9 (Stamatakis, 2014) on each separate orthologue alignment using the  
286 GTRCAT model with -f a flags, 1000 bootstrap replicates and default settings. Additional analyses  
287 were performed using a supermatrix (concatenated alignment) by ML as described above and with a  
288 Bayesian approach using MrBayes 3.2.6 (Huelsenbeck and Ronquist, 2001; Ronquist and  
289 Huelsenbeck, 2003) as implemented in CIPRESS Gateway (Miller et al., 2010) using four chains,  
290 two runs of 5,000,000 generations with the invgamma rate of variation and a sample frequency of  
291 1000. Density curves and the ESS (Effective Sample Size) from the MrBayes output was analyzed  
292 using Tracer v. 1.7 (Rambaut et al., 2018). Resulting trees were visualized and edited in FigTree  
293 v.1.4.3 (Rambaut, 2016).

294

## 295 **2.7 Analysis using species tree estimation**

296 Species trees were inferred with two coalescence-based programs using the ML gene trees  
297 generated with RAxML. We used ASTRAL-II v. 5.5.7 (Mirarab and Warnow, 2015; Sayyari and  
298 Mirarab, 2016) and calculated support with local posterior probability (LPP). An additional analysis  
299 was performed with STAR (Liu et al., 2009) as implemented in the STRAW webserver  
300 (<http://bioinformatics.publichealth.uga.edu/SpeciesTreeAnalysis/index.php>). Individual gene trees  
301 were rooted online using the STRAW webserver. We selected species of *Gilbertiodendron* to root  
302 trees in all analyses.

303

## 304 **2.8 Estimation of gene tree concordance**

305 We assessed species-tree and gene-tree conflict and concordance with an emphasis on the  
306 *Anthonotha* clade. We used the concatenated-based species tree obtained with RAxML with 74 %  
307 matrix occupancy and 100% taxon completeness, and we also examined gene-tree conflict using the  
308 ASTRAL-II reference species tree. Concordance was quantified using the pipeline PhyParts  
309 (<https://bitbucket.org/blackrim/phyParts>) (Smith et al., 2015) and visualized with the ETE3 Python  
310 toolkit (Huerta-Cepas et al., 2016) as implemented in the script PhyPartsPieCharts  
311 (<https://github.com/mossmatters/MJPythonNotebooks>). Both analyses were performed with all  
312 branches regardless of their support, and also excluding branches with low support (-s 0.7 filter).

313

## 314 **2.9 Mapping characters, ancestral state reconstructions and correlation of character states**

315 We studied seven floral traits pertaining to floral symmetry, petals, stamens and staminodes  
316 (Table 1). Character states for all taxa were scored and obtained from published taxonomic and  
317 morphological studies of the Detarioideae (Bruneau et al., 2014; Tucker, 2002b, 2002a) and from  
318 more detailed studies in *Anthonotha* (Breteler, 2010, 2008), *Isomacrolobium* (Breteler, 2011),  
319 *Englerodendron* (Breteler, 2006; van der Burgt et al., 2007), *Pseudomacrolobium menzei* Hauman  
320 (De Wildeman, 1925; INEAC, 1951; IRCB, 1952; Wilczek et al., 1952), *Gilbertiodendron* (de la  
321 Estrella et al., 2014; de la Estrella and Devesa, 2014a, 2014b), *Didelotia* (Oldeman, 1964; van der  
322 Burgt, 2016), *Oddoniodendron* (Banak and Breteler, 2004), *Librevillea klainei* (Pierre ex Harms)  
323 Hoyle (Tucker, 2000), *Berlinia* (Mackinder, 2001; Mackinder and Harris, 2006; Mackinder and  
324 Pennington, 2011) and *Isoberlinia* (Tucker, 2002a). Additional information was obtained from  
325 available images and voucher specimens (Table S2). Our sampling encompassed all the  
326 morphological diversity for these floral traits observed in the extant species of the *Anthonotha* clade.  
327 For the remaining genera the scoring was done for the species representing each genus. Characters  
328 were scored as binary states (Table S3) and ancestral state reconstructions were performed on the tree  
329 obtained from the RAxML analyses using parsimony and likelihood methods as implemented in  
330 Mesquite ver. 2.75 (Maddison and Maddison, 2015). Maximum likelihood reconstructions were  
331 obtained with the Mk1 model of trait evolution.

332 Members of the *Anthonotha* clade vary in petal, stamen and staminode number and certain  
333 species also display reduction or increase in the number of organs within whorls. To determine  
334 whether changes towards an increase or decrease of organ numbers were correlated in their evolution,  
335 we tested the correlation between changes: 1) in petal and stamen numbers, 2) petal and staminode  
336 number, 3) flower symmetry and intraspecific variation in organ numbers, and 4) intraspecific  
337 variation in petal and stamen numbers. The characters were coded as binary factors (see Table S3 for  
338 scoring details) and pairs of characters were compared between ML independence and dependence  
339 models, and with Bayesian MCMC comparing the discrete dependent and independent models. After  
340 each comparison, likelihood ratios and Bayes factors were compiled to determine significance of  
341 correlation. These analyses were performed with BayesTraits v3 (Pagel and Meade, 2006).

342

343

344

## 345 **2.10 Morphological characterization of petal types and their identity based on** 346 **micromorphology**

347 To determine whether differences in petal morphology along the dorsoventral axis within the  
348 flower were associated with different petal identities, we analyzed the morphology of each petal  
349 within each species using the same voucher specimens and source of information used for mapping  
350 characters noted above. Two parameters were used to establish the identity of each petal based on  
351 these arrangement types: the overall morphology of the petal (size, symmetry, and shape) and its  
352 location within the dorsoventral axis of the flower (adaxial, lateral or abaxial). This analysis focused  
353 on species of the *Anthonotha* clade where we were able to sample the entire extant diversity. Once  
354 the identity at the macro level was established for each species, we then examined whether all petals  
355 (adaxial, lateral and abaxial) have similar or different epidermal types, the latter suggesting  
356 differences in petal identity within the flower. We analyzed in total 21 species for the four genera  
357 (*Anthonotha*, *Isomacrolobium*, *Englerodendron* and *Pseudomacrolobium*) of our focal group (Table  
358 S4). Flowers from voucher specimens were first re-hydrated and later preserved in 70% ethanol.  
359 Petal micromorphology for each individual petal within each species was analysed on both sides with  
360 a light microscope (Nikon optiphot-2) and some specimens were further examined using a Zeiss  
361 scanning electron microscope (SEM) at high vacuum (EHT=5.00 kv). Classification of epidermal  
362 types and their level of differentiation were based on cell-shape traits (primary sculpture) and on the  
363 fine relief of the cell wall, or secondary sculpture (Barthlott, 1990). The terminology of these  
364 epidermal types follows (Ojeda et al., 2009).

365

## 366 **3. Results**

### 367 **3.1 Bait capture and mapping success**

368 We obtained an average of 919,856.5 reads per sample and recovered on average 84.89 % ( $\pm$   
369 3.94) of the baits in the set of samples included. Of these, an average of 35.77 % ( $\pm$  13.15) of the  
370 reads mapped to the *A. fragans* reference contigs (Table S5). Overall, we obtained a coverage  
371 between 10-100X for at least 50% of the captured bait (Fig. S1). The final concatenated matrix  
372 consisted of 61 taxa, 922 exons (clusters) and 239,334 aligned bp with 74.06 % overall matrix  
373 occupancy (Table S6). The matrix contained 31,950 (13.35%) variable sites and 14,448 (6.04%)  
374 potentially parsimony informative sites. The final alignment is deposited on the Dryad Digital  
375 Repository: XXX.

### 376 **3.2 Phylogenetic relationships within the Anthonotha clade**

377 We obtained congruent topologies with ML (Fig. S2) and Bayesian (Fig. S3) analyses using the  
378 concatenated matrix, which resulted in resolved relationships and high support for all the lineages.  
379 The same lineages and topology were also recovered on the ML analysis using the individual genes  
380 (Fig. S4) and similar topologies were also obtained with the coalescent approaches using ASTRAL-II  
381 (Figs. S5) and STAR (Fig. S6). We did not obtain different topologies when only the 247 genes with  
382 the highest level of taxon completeness were included in the coalescent analyses of ASTRAL-II and  
383 STAR. We only noted a reduction in support of the relationship between *Anthonotha* ss and the  
384 cluster containing *Englerodendron*, *Isomacrolobium* and *Pseudomacrolobium*, and the remaining  
385 outgroup taxa (Fig. S5B). All these analyses identified the clade comprising *Englerodendron*  
386 *korupense*, *E. gabunense* and *Isomacrolobium graciflorum* with the lowest level of support relative to  
387 other lineages of our study (Figs. S2-S6). All the species included with multiple individuals and those  
388 with replicates formed sister clades, except *A. pynaerti*, *Englerodendron gabunense* and *E.*  
389 *korupense*. The analysis of gene congruence among the 247 genes with the highest level of taxon  
390 completeness revealed the presence of conflict of topologies with low frequency, and we did not  
391 observe discordant loci dominated by a single alternative topology. This discordance was  
392 concentrated in the Anthonotha clade, suggesting the presence of substantial incomplete lineage  
393 sorting in this group. Similar distribution of concordance and conflict was revealed using the  
394 ASTRAL-II species as a reference (Fig. S7) or the RAxML concatenated tree as a reference (Fig.  
395 S8). We did not find a difference in the level of conflict and concordance when only the highest  
396 supported branches were included (Fig. S7B and Fig. S8B).

397 In all our analyses, two main clades were recovered with high support within our focal group,  
398 one corresponding to all the *Anthonotha* ss species and the other containing the three remaining  
399 genera *Isomacrolobium*, *Englerodendron* and *Pseudomacrolobium* (Fig. 1). The latter monospecific  
400 genus has not been included before in phylogenetic analyses, and the grouping of these three genera  
401 was an unexpected result, given their diverse flower morphology (e.g. flower symmetry and size of  
402 petals).

403

### 404 **3.3 Evolution of floral characters and ancestral state reconstructions**

405 Our reconstructions suggest that the ancestral condition in the Anthonotha clade is a  
406 zygomorphic flower with five petals of two types, the largest on the adaxial side with a distinct  
407 morphology and the other four petals on the lateral and abaxial sides with a similar overall

408 morphology. The ancestral reconstructions also suggest the presence of three large stamens on the  
409 adaxial side and six staminodes (Fig. 1H). This flower organization was observed in most species (12  
410 out of 17) within *Anthonotha* ss. Our mapping and reconstruction analyses indicate that floral  
411 modifications consisting mainly in a reduction in number of petals, stamens and staminodes (Table 2  
412 and Fig. S9), and more frequently in the *Isomacrolobium*, *Englerodendron* plus *Pseudomacrolobium*  
413 clade.

414 Our analyses suggest that the petal is the most labile organ among those we studied, involving  
415 modifications in petal types (morphology and location within the dorsoventral axis) (Fig. 2A) and  
416 number (organ merism) (Fig. 2B) with at least seven and eight independent transitions, respectively  
417 (Fig. S9). In addition to the seven modifications (increase and decrease) in petal types (Fig. 3A and  
418 C), we also identified three independent transitions to an alternative arrangement of two petal types.  
419 In these three independent transitions, the adaxial and the two lateral petals display the same  
420 morphology with the two abaxial petals having a distinctive morphology (Fig. 3B).

421

### 422 **3.4 Correlation of floral character traits in the *Anthonotha* clade**

423 Despite an overall trend towards a reduction in the number of petals, stamens and staminodes  
424 within this group, there is a lack of evidence that modifications in these three organs are correlated  
425 within a species. We also did not find evidence that flower symmetry is associated with the evolution  
426 of intraspecific variability in petal or stamen number. In addition, we did not find evidence that  
427 intraspecific variation within the petal whorl is correlated with intraspecific variation within the  
428 stamen whorl. Thus, our results suggest that within this group all these seven flower characters seem  
429 to have evolved independently.

430

### 431 **3.5 Petal identity based on their location along the dorsoventral axis of symmetry and their** 432 **corresponding micromorphology**

433 Here we analyzed a total of 21 species within the *Anthonotha* clade. Of these, 11 species were  
434 similar to the ancestral condition inferred for the *Anthonotha* clade while seven species exhibited  
435 four independent transitions towards a reduction to one petal type. In addition, we also studied two  
436 species representing two of the three independent transitions to an alternative arrangement of two  
437 petal types and one species representing one (of two) independent shifts towards an increase in petal  
438 types (Table S4). We recorded two major epidermal types among all species that were examined

439 (Fig. 4 and Table S4). All species have papillose cells, either conical cells with striations (PCS) or  
440 knobby cells with a rugose surface (PKR). PCS cells are characterized by a circular shape with the  
441 striations directed towards the highest point of the cell (Fig. 4C-E). In contrast, the cell shape of PKR  
442 is less rounded, the base of the cell is bigger (and with a square shape), and the striations of the  
443 rugose surface is more evenly distributed on the cell surface (Fig. 4H-I). Our analysis and  
444 comparison of epidermal types of each distinctive petal types (based on their morphology) and their  
445 location along the dorsoventral axis (adaxial, lateral and abaxial) within the flower, reveals a lack of  
446 epidermal micromorphology differentiation corresponding to differences in petal identity (Fig. 4).  
447 This suggests that, at the micromorphological level, all petal types within each species have a similar  
448 petal identity, regardless of position or morphology. However, we found a trend towards the presence  
449 of less differentiated cells on species with flowers where the petals are smaller or less exposed (Fig.  
450 S10).

451

## 452 **4. Discussion**

### 453 **4.1 The application of target enrichment as an integrative strategy to increase resolution at** 454 **multiple taxonomic levels**

455 Target enrichment (exome capture) is emerging as an efficient strategy for phylogenetic  
456 reconstruction across different taxonomic levels (Budenhagen et al., 2016; Mandel et al., 2014),  
457 allowing the combination of different studies using a common set of markers. Target enrichment is a  
458 cost-effective strategy to obtain markers for phylogenetic analysis at multiple taxonomic levels,  
459 including a set of markers for the entire flowering plants (angiosperms) (Budenhagen et al., 2016;  
460 Johnson et al., 2018). This approach has been successfully applied in several plant families (Carlsen  
461 et al., 2018; Comer et al., 2016; Herrando-Morairaa et al., 2018; Mandel et al., 2015, 2014; Moore et  
462 al., 2018) and it has proved useful to reconstruct relationships among closely related genera, within  
463 the same genus (Bogarin et al., 2018; Fragoso-Martínez et al., 2017; Heyduk et al., 2016; Mitchell et  
464 al., 2017; Schmickl et al., 2016) and at species level (Nicholls et al., 2015; Villaverde et al., 2018).  
465 Within Leguminosae, this approach has been applied on lineages of the Papilionoideae and  
466 Caesalpinioideae (De Sousa et al., 2014; Nicholls et al., 2015; Ogutcen et al., 2018; Vatanparast et al.,  
467 2018) and our study is the first to use target enrichment outside these subfamilies using a complete  
468 sampling representing the entire extant diversity of the target group.

469 The recovery of the captured genes in target enrichment analyses have employed several  
470 strategies (or pipelines). PHYLUCE was developed for ultraconserved elements (UCEs) and uses a  
471 stringent filter to exclude paralogous sequences after the *de novo* assembly (Faircloth, 2015).  
472 HybPiper is also a common strategy used to recover captured regions. This strategy first maps the  
473 reads to a reference sequence and subsequently performs a *de novo* assembly, allowing the recovery  
474 of both exonic and intronic regions (Johnson et al., 2016). This pipeline identifies potential  
475 paralogous regions, but it lacks a specific guideline on how to handle paralogs after their  
476 identification. More recently, Fer and Schmickl (2018) developed HybPhyloMarker, which contains  
477 a set of scripts suitable from read quality to the reconstruction of phylogenetic trees; however, the  
478 identification and exclusion of paralogous is not specifically addressed. Unlike these bioinformatic  
479 pipelines, we employed an approach designed to recover orthologues from transcriptomes and low  
480 coverage genomes, which allows a more in depth assessment of paralogous sequences (Yang and  
481 Smith, 2014). This pipeline uses gene tree-based orthology approaches to identify paralogues regions  
482 (clusters) in the data set. This pipeline contains four strategies to identify and exclude these  
483 paralogous regions, and in this study we used the 1to1 strategy, which identifies homologues among  
484 the samples analyzed based on a strictly one-to-one assessment. This particular pipeline has been  
485 used both to select genes for the development of target enrichment (Vatanparast et al., 2018), as well  
486 as to recover captured regions for phylogenetic analyses (Nicholls et al., 2015).

487 Using this 1to1 approach, we were able to recover 67 % of the total bait size after quality  
488 filtering and this data set allowed us to increase the level of resolution among closely related genera,  
489 providing strong phylogenetic support when applied to all extant species within *Anthonotha* ss (Fig.  
490 1). This also allowed us to infer relationships within this genus and the other three closely related  
491 genera, despite of the potential for incomplete lineage sorting (ILS) observed in our data sets (Figs.  
492 S7-S8). Our preliminary analyses at higher taxonomic levels (including nearly all described genera  
493 within Detarioideae) suggested the Detarioideae bait set and the strategy used to recover orthologues  
494 is suitable for reconstructing highly supported relationships at the subfamily level (M. de la Estrella  
495 *et al.*, in prep.). This hybrid capture approach will increase the level of resolution compared to  
496 previous analyses (Bruneau et al., 2008; de la Estrella et al., 2017; LPWG, 2017) and allow the  
497 possibility to build a more comprehensive phylogeny of the subfamily at multiple taxonomic levels.  
498 This strategy is also suitable for analyses at the intraspecific level, as the application of this bait set  
499 has recovered enough signal to reconstruct the population structure and demography of *Anthonotha*



500 *macrophylla*, one of the most widely distributed species in the Guineo-Congolian region (S.  
501 Cervantes *et al.*, in prep.).

502

#### 503 **4.2 The Anthonotha clade exhibits remarkable floral diversity at multiple levels with overall** 504 **tendency to reduction in organ number**

505 Detarioideae and Dialioideae are renowned for their high floral diversity, including floral  
506 symmetry, and shifts in number and fusion of organs. Although this diversity and level of variation  
507 have been documented in major clades (Bruneau *et al.*, 2014; Zimmerman *et al.*, 2017), it has rarely  
508 been studied in detail among closely related genera (or within a genus) using a complete taxon  
509 sampling and a well resolved phylogenetic framework. One of our major findings is the extensive  
510 diversity in the number of transitions within the Anthonotha clade, with at least 35 instances of  
511 modifications in the seven floral traits we analyzed, suggesting that at least 30% of the species have  
512 modified at least one of these floral traits (Table 2). Our analyses also suggests that this group has an  
513 overall tendency towards a reduction of floral organs, and in particular a reduction in the number of  
514 petals (Table 2 and Fig. 2). Petal number reduction, however, occurs only with the lateral and abaxial  
515 petals, while the adaxial petal is always retained, except in the most extreme condition of complete  
516 lack of petals. Apetalous flowers are commonly observed in other Detarioideae genera and are  
517 frequent in the resin-producing clade (Fougère-Danezan *et al.*, 2010), where apetalous is constant  
518 within a genus. In Detarioideae, 20% (17 of 81) of genera are considered apetalous and this lack of  
519 petals is observed in almost all species within these genera (Bruneau *et al.*, 2014; de la Estrella *et al.*,  
520 2018; Tucker, 2000). This is the case, for example in *Didelotia* (Fig. 1B), a genus of 11 species  
521 where all species are apetalous. In our focal group, only one species, *Isomacrolobium vignei*, has  
522 been reported with a complete absence of petals, and this is observed in only some of the specimens  
523 analyzed (Breteler, 2011), thus highlighting the remarkable lability of this trait at multiple levels  
524 within the Anthonotha clade.

525 In this study we found that the petal is the most labile of the floral traits that we studied. Flowers  
526 of the four genera in the Anthonotha clade display high diversity of petal sizes, number, shape and  
527 arrangement in the flower (Figs. 2 and 3). Some species, such as *Isomacrolobium leptorhachis*, *I.*  
528 *nigericum* and *I. brachyrachis*, display different petal shapes and sizes along the dorsoventral axis of  
529 the flower, similar to some extent to the level of morphological differentiation of the papilionoid  
530 flower, with one adaxial (dorsal), two lateral, and two abaxial (ventral) petals. A different  
531 arrangement is observed in the four *Englerodendron* species with actinomorphic flowers (Fig. 3C),

532 where all petals display the same size and morphology within the same flower, but considerable  
533 diversity in shape and size is observed among the four species. One species (*E. conchyliphorum*) has  
534 all petals resembling the large adaxial (dorsal petal) typical of the zygomorphic flowers of most of  
535 the genera in the Berlinia clade (Bruneau et al., 2014), while in the remaining three species all petals  
536 resemble those from lateral petals (Breteler, 2006; van der Burgt et al., 2007).

537 The Anthonotha clade also displays high levels of intraspecific variation in petal and stamen  
538 number with four and three independent transitions, respectively (Table S2). A high level of  
539 intraspecific variation has been observed in early diverging angiosperms, including lineages of  
540 eudicots sister to core asterid and rosid clades (Ronse De Craene, 2015). However, intraspecific  
541 variation is not a common feature of the more derived core eudicot clades. In our focal group, the  
542 most extreme level of variation has been reported in *Isomacrolobium vignei*, with intra-individual  
543 variation in the number of petals ranging from 0 to 4 (Breteler, 2011). Such levels of variation have  
544 been reported in a few instances in core eudicots (Kitazawa and Fujimoto, 2014); for instance in  
545 *Cardamine hirsuta* (Brassicaceae) where the intra-individual variation in petal number is due to loss  
546 of developmental robustness and the evolution of a selfing syndrome (Monniaux et al., 2016).  
547 However, the mechanisms behind this variability is not clear in the case of *I. vignei* and further work  
548 is required on this species.

549

### 550 **4.3 A different molecular mechanism behind petal identity in the Anthonotha clade and** 551 **Detarioideae?**

552 One of the main questions arising from our analyses is what is maintaining this diversity of floral  
553 traits among closely related taxa. Tucker, (2002a, 2002b) has characterized the developmental  
554 changes that occur in taxa that display modifications in petal number in a number of Detarioideae.  
555 However, despite recent advances in the understanding of the molecular basis of petal identity and  
556 petal symmetry in some model Papilionoideae species (*Lotus* and *Pisum*), it is not clear whether the  
557 same transcription factors (*CYCLOIDEA*, *WOX1*, *MIXTA-like* and *MADS-box*) (Feng et al., 2006;  
558 Wang et al., 2010, 2008; Weng et al., 2011; Xu et al., 2013; Zhuang et al., 2012) are also implicated  
559 in the evolution of the diverse morphology observed in Detarioideae. Analyses of gene expression in  
560 several genera of the Papilionoideae have further demonstrated the role some of these transcription  
561 factors play during the evolution of petal morphology. For instance, the dorsalization (the acquisition  
562 of the morphology of the dorsal petal) of lateral and ventral petals in *Cadia purpurea* (G. Piccioli  
563 Aiton is the result of a homeotic transformation due to an expansion of the expression domain to the

564 lateral and ventral domains of the *CYCLOIDEA* gene conferring dorsal identity (Pennington et al.,  
565 2006). Similarly, the lateralization of the dorsal and ventral petals among *Lotus* species of the  
566 Macaronesia region have been associated with a shift in the timing of expression of the *CYCLOIDEA*  
567 gene responsible for lateral identity (Ojeda et al., 2017). Furthermore, specimens of *Lathyrus*  
568 *odoratus* L. with modified dorsal petals (hooded mutant, *hhd*) have been explained by alterations of  
569 gene expression and sequence truncation of the *CYCLOIDEA* dorsal identity gene, which resulted in  
570 a homeotic alteration resulting in the lateralization of the dorsal petal in this loss of function mutant  
571 (Woollacott and Cronk, 2018). In all these species, modifications in petal identity are also  
572 accompanied by modifications in the petal micromorphology associated with each identity. As such,  
573 in the papilionoid flower the typical petal micromorphology characteristic of each petal along the  
574 dorsoventral axis has been altered during changes in petal morphology (Ojeda et al., 2009).

575 In the Anthonotha clade, although we observed epidermal types similar to those previously  
576 reported in other legumes (Ojeda et al., 2009), their distribution on the petal types along the  
577 dorsoventral axis does not suggest that each petal has a different identity. Even on the species with  
578 three distinct petal types (*Isomacrolobium leptorhachis*, *I. nigericum*, and *I. brachyrachis*) with one  
579 adaxial (dorsal), two lateral and two abaxial (ventral) petals (Fig. 3 A), all five petals have the same  
580 petal micromorphology. This is congruent with previous analyses of more limited sampling outside  
581 the Papilionoideae, which suggested that the micromorphological differentiation along the  
582 dorsoventral axis of the flower is unique to this subfamily (Ojeda et al., 2009). We also did not find  
583 an association of a particular epidermal type with a specific petal type in species with zygomorphic  
584 flowers, but there is a tendency for PKR cells to occur more often (twice) than PCS cell types and the  
585 opposite trend is observed in the four species with actinomorphic flowers, with PCS recorded more  
586 often (three times) than PKR cell types (Table S4).

587 Among the four genera we studied in detail, *Isomacrolobium* has the highest level of diversity of  
588 petal types. In this genus only one species displays the ancestral state inferred for the Anthonotha  
589 clade and we observed three different modifications to the ancestral type arrangement. But even in  
590 this group there is no association with a specific epidermal type. For example, in *I. explicans*, where  
591 the lateral petals resemble the adaxial (dorsal) petal, suggesting the possibility of dorsalization of the  
592 ventral petals, there are no differences in epidermal morphology (Fig. 3B). We found the same for the  
593 only species of *Isomacrolobium* with zygomorphic flowers, *I. obanense*, where all petals resemble  
594 the adaxial (dorsal) petal (Fig. 3C).

595 Overall, our results provide a solid phylogenetic framework to further explore detailed  
596 comparisons among species with contrasting morphologies and to analyze in more detail the  
597 molecular basis underlying this diversity on petal morphology.

598

## 599 **Acknowledgements**

600 We thank the staff for the Meise and Kew herbaria for their support during the visits and  
601 collection of material. M.E. was funded by the European Union's Horizon 2020 research and  
602 innovation programme under the Marie Skłodowska-Curie grant agreement No 659152  
603 (GLDAFRICA). This work was supported by the Fonds de la Recherche Scientifique-FNRS (F.R.S.-  
604 FNRS) under Grants n° T.0163.13 and J.0292.17F, and by the Belgian Federal Science Policy Office  
605 (BELSPO) through project AFRIFORD from the BRAIN program. Permission to reproduce  
606 photographs was generously given by C. Jongkind/Fauna & Flora International.

607

## 608 **Author Contribution**

609 DIO and OH designed the study; DIO, EK, ME, SC, EB, JM, BD participated in the bait design and  
610 performed the laboratory analyses. DIO and EB conducted the analyses. DIO wrote the manuscript.  
611 SJ and BD contributed to collection of plant material. All authors read the first draft and provided  
612 comments.

613

## 614 **References**

615 Altschul, S.F., Madden, T.L., Schaffer, A.A., Zhang, J., Zhang, Z., Miller, W., Lipman, D.J., 1997.

616 Gapped BLAST and PSI-BLAST: a new generation of protein database search programs.

617 *Nucleic Acids Res.* 25, 3389–3402.

618 Banak, L., Breteler, F., 2004. *Novitates Gabonenses* 50. Le genre *Odoniodendron* de Basse Guinee  
619 une revision taxonomique du genre avec description de deux especes nouvelles du Gabon.

620 *Adansonia* 26, 241–250.

621 Bankevich, A., Nurk, S., Antipov, D., Gurevich, A.A., Dvorkin, M., Kulikov, A.S., Lesin, V.M.,

622 Nikolenko, S.I., Pham, S., Prjibelski, A.D., Pyshkin, A. V., Sirotkin, A. V., Vyahhi, N., Tesler,

623 G., Alekseyev, M. a., Pevzner, P. a., 2012. SPAdes: a new genome assembly algorithm and its

624 applications to single-cell sequencing. *J. Comput. Biol.* 19, 455–477.

- 625 Banks, H., Rudall, P.J., 2016. Pollen structure and function in caesalpinoid legumes. *Am. J. Bot.*  
626 103, 423–436.
- 627 Barthlott, W., 1990. Scanning electron microscopy of the epidermal surface in plants, in: Claugher,  
628 D. (Ed.), *Scanning Electron Microscopy in Taxonomy and Functional Morphology*. Clarendon  
629 Press, Oxford, pp. 69–83.
- 630 Bogarin, D., Perez\_Escobar, O., Groenenberg, D., Holland, S., Karremans, A., Lemon, E., Lemon,  
631 A., Puplin, F., Smets, E., Gravendeel, B., 2018. Anchored hybrid enrichment generated nuclear,  
632 plastid and mitochondrial markers resolve the *Lepanthes horrida* (Orchidaceae:  
633 Pleurothallidinae) species complex. *Mol. Phylogenet. Evol.* 129, 27–47.
- 634 Bolger, A., Lohse, M., Usadel, B., 2014. Trimmomatic: A flexible trimmer for Illumina sequence  
635 data. *Bioinformatics* 30, 2114–2120.
- 636 Borowiec, M.L., 2016. AMAS: a fast tool for alignment manipulation and computing of summary  
637 statistics. *PeerJ* 4, e1660.
- 638 Breteler, F.J., 2011. Revision of the African genus *Isomacrolobium* (Leguminosae,  
639 Caesalpinioideae). *Plant Ecol. Evol.* 144, 64–81.
- 640 Breteler, F.J., 2010. Revision of the African genus *Anthonotha* (Leguminosae, Caesalpinioideae).  
641 *Plant Ecol. Evol.* 143, 70–99.
- 642 Breteler, F.J., 2008. *Anthonotha* and *Isomacrolobium* (Leguminosae, Caesalpinioideae): Two Distinct  
643 Genera. *Syst. Geogr. Plants* 78, 137–144.
- 644 Breteler, F.J., 2006. *Novitates Gabonenses* 56. Two *Anthonotha* species from gabon transferred to  
645 *Englerodendron* (Fabaceae, Caesalpinioideae). *Adansonia* 28, 105–111.
- 646 Bruneau, A., Klitgaard, B.B., Prenner, G., Fougère-Danezan, M., Tucker, S.C., 2014. Floral  
647 evolution in the Detarieae (Leguminosae): phylogenetic evidence for labile floral development  
648 in an early-diverging legume lineage. *Int. J. Plant Sci.* 175, 392–417.
- 649 Bruneau, A., Mercure, M., Lewis, G.P., Herendeen, P.S., 2008. Phylogenetic patterns and  
650 diversification in the caesalpinoid legumes. *Botany* 86, 697–718.
- 651 Budenhagen, C., Lemmon, A.R., Lemmon, E.M., Bruhl, J., Cappa, J., Clement, W.L., Donoghue, M.,

- 652 Edwards, E.J., Hipp, A.L., Kortyna, M., Mitchell, N., Moore, A., Prychid, C.J., Segovia-  
653 Salcedo, M.C., Simmons, M.P., Soltis, P.S., Wanke, S., Mast, A., 2016. Anchored  
654 phylogenomics of angiosperms I: Assessing the robustness of phylogenetic estimates. bioRxiv.
- 655 Bushmanova, E., Antipov, D., Lapidus, A., Suvorov, V., Prjibelski, A.D., 2016. maQUAST: a  
656 quality assessment tool for de novo transcriptome assemblies. *Bioinformatics* 32, 2210–2212.
- 657 Carlsen, M., Fer, T., Schmickl, R., Leong-Skornickova, J., Newman, M., Kress, W., 2018. Resolving  
658 the rapid plant radiation of early diverging lineages in the tropical Zingiberales: pushing the  
659 limits of genomic data. *Mol. Phylogenet. Evol.*  
660 <https://doi.org/https://doi.org/10.1016/j.ympev.2018.07.020>
- 661 Chanderbali, A.S., Berger, B.A., Howarth, D.G., Soltis, P.S., Soltis, D.E., 2016. Evolving ideas on  
662 the origin and evolution of flowers: New perspectives in the genomic era. *Genetics* 202, 1255–  
663 1265.
- 664 Comer, J.R., Zomlefer, W.B., Barrett, C.F., Stevenson, D.W., Heyduk, K., Leebens-Mack, J.H.,  
665 2016. Nuclear phylogenomics of the palm subfamily Arecoideae (Arecaceae). *Mol. Phylogenet.*  
666 *Evol.* 97, 32–42.
- 667 Criscuolo, A., Gribaldo, S., 2010. BMGE (Block Mapping and Gathering with Entropy): a new  
668 software for selection of phylogenetic informative regions from multiple sequence alignments.  
669 *BMC Evol. Biol.* 10, 1–21.
- 670 Cronk, Q., Moller, M., 1997. Genetics of flower symmetry revealed. *TREE* 12, 85–86.
- 671 de la Estrella, M., Devesa, J., 2014a. The Genus *Gilbertiodendron* (Leguminosae-Caesalpinioideae)  
672 in Western Africa. *Syst. Bot.* 39, 160–192.
- 673 de la Estrella, M., Devesa, J.A., 2014b. *Gilbertiodendron grandistipulatum* (Leguminosae-  
674 Caesalpinioideae), a singular species from West Central Africa and new record for Congo  
675 (Brazzaville). *Boletín la Soc. Argentina Botánica* 49, 137–144.
- 676 de la Estrella, M., Forest, F., Klitgård, B., Lewis, G.P., Mackinder, B.A., De Queiroz, L.P., Wieringa,  
677 J.J., Bruneau, A., 2018. A new phylogeny-based tribal classification of subfamily Detarioideae,  
678 an early branching clade of florally diverse tropical arborescent legumes. *Sci. Rep.* 8, 6884.
- 679 de la Estrella, M., Forest, F., Wieringa, J.J., Fougère-Danezan, M., Bruneau, A., 2017. Insights on the

- 680 evolutionary origin of Detarioideae, a clade of ecologically dominant tropical African trees.  
681 New Phytol.
- 682 de la Estrella, M., Wieringa, J.J., Mackinder, B., Van Der Burgt, X., Devesa, J.A., Bruneau, A., 2014.  
683 Phylogenetic analysis of the African genus *Gilbertiodendron* J. Léonard and related genera  
684 (Leguminosae-Caesalpinioideae-Detarieae). Int. J. Plant Sci. 175, 975–985.
- 685 De Sousa, F., Bertrand, Y.J.K., Nylinder, S., Oxelman, B., Eriksson, J.S., Pfeil, B.E., 2014.  
686 Phylogenetic properties of 50 nuclear loci in *Medicago* (Leguminosae) generated using  
687 multiplexed sequence capture and next-generation sequencing. PLoS One 9, e109704.
- 688 De Wildeman, E., 1925. *Berlinia mengei*, in: Lechevalier, J. (Ed.), *Plantae Bequaertianae Etudes Sur*  
689 *Les Recoltes Botaniques Du Dr J. Bequaert Charge de Missions Au Congo Belge*. Ecole  
690 speciale de Commerce annee a la Faculte de Droit de l'Universite de Gand, Ghent, pp. 143–  
691 144.
- 692 Doyle, J.J., Doyle, J.L., 1987. A rapid DNA isolation procedure for small amounts of fresh leaf  
693 tissue. Phytochem. Bull. 19, 11–15.
- 694 Faircloth, B.C., 2015. PHYLUCE is a software package for the analysis of conserved genomic loci.  
695 Bioinformatics 32, 786–788.
- 696 Feng, X., Zhao, Z., Tian, Z., Xu, S., Luo, Y., Cai, Z., Wang, Y., Yang, J., Wang, Z., Weng, L., Chen,  
697 J., Zheng, L., Guo, X., Luo, J., Sato, S., Tabata, S., Ma, W., Cao, X., Hu, X., Sun, C., Luo, D.,  
698 2006. Control of petal shape and floral zygomorphy in *Lotus japonicus*. Proc. Natl. Acad. Sci.  
699 U. S. A. 103, 4970–4975.
- 700 Fér, T., Schmickl, R.E., 2018. Hybphylomaker: Target enrichment data analysis from raw reads to  
701 species trees. Evol. Bioinforma. 14, 1–9.
- 702 Fougère-Danezan, M., Herendeen, P.S., Maumont, S., Bruneau, A., 2010. Morphological evolution in  
703 the variable resin-producing Detarieae (Fabaceae): Do morphological characters retain a  
704 phylogenetic signal? Ann. Bot. 105, 311–325.
- 705 Fragoso-Martínez, I., Salazar, G.A., Martínez-Gordillo, M., Magallón, S., Sánchez-Reyes, L.,  
706 Lemmond, E.M., Lemmone, A.R., Sazatornil, F., Mendozab, C.G., 2017. A pilot study  
707 applying the plant Anchored Hybrid Enrichment method to New World sages (*Salvia subgenus*

- 708 Calosphace; Lamiaceae). *Mol. Phylogenet. Evol.*
- 709 Grabherr, M., Haas, B., Yassour, M., Levin, J., Thompson, D., Amit, I., Adiconis, X., Fan, L.,  
710 Raychowdhury, R., Zeng, Q., 2011. Full-length transcriptome assembly from RNA-Seq data  
711 without a reference genome. *Nat. Biotechnol.* 29, 644–652.
- 712 Haas, B.J., Papanicolaou, A., Yassour, M., Grabherr, M., Blood, P.D., Bowden, J., 2013. De novo  
713 transcript sequence reconstruction from RNA-Seq: reference generation and analysis with  
714 Trinity. *Nat. Protoc.* 8, 10.1038.
- 715 Herrando-Morairaa, S., Callejab, J., Carnicerob, P., Fujikawac, K., Galbany-Casalsb, M., Garcia-  
716 Jacasa, N., Imd, H., Kime, S., Liuf, J., López-Alvaradob, J., López-Pujola, J., Mandelg, J.,  
717 Massóaa, S., Mehreganh, I., Montes-Morenoa, N., Pyaki, E., Roquetj, C., Sáezb, L., Sennikovk,  
718 A., Susannaa, A., Vilatersana, R., 2018. Exploring data processing strategies in NGS target  
719 enrichment to disentangle radiations in the tribe Cardueae (Compositae). *Mol. Phylogenet. Evol.*
- 720 Heyduk, K., Trapnell, D.W., Barrett, C.F., Leebens-Mack, J., 2016. Phylogenomic analyses of  
721 species relationships in the genus *Sabal* (Arecaceae) using targeted sequence capture. *Biol. J.*  
722 *Linn. Soc.* 117, 106–120.
- 723 Huelsenbeck, J.P., Ronquist, F., 2001. MRBAYES: Bayesian inference of phylogeny. *Bioinformatics*  
724 17, 754–755.
- 725 Huerta-Cepas, J., Serra, F., Bork, P., 2016. ETE 3: Reconstruction, analysis, and visualization of  
726 phylogenomic data. *Mol. Biol. Evol.* 33, 1635–1638.
- 727 INEAC, 1951. *Pseudomacrolobium*, in: *Flore Du Congo Belge et Du Ruanda-Urundi*. Jardin  
728 Botanique National de Belgique, pp. 383–386.
- 729 IRCB, I.R.C.B., 1952. *Tetraberlinia*. *Bull. des Seances* 2, 477.
- 730 Johnson, M., Pokorny, L., Dodsworth, S., Botigue, L., Cowan, R., Devault, A., Eiserhardt, W.,  
731 Epitawalage, N., Forest, F., Kim, J., Leebens-Mack, J., Leitch, I., Maurin, O., Soltis, D., Soltis,  
732 P., Wong, G., Baker, W., Wicket, N., 2018. A universal probe set for targeted sequencing of 353  
733 nuclear genes from any flowering plant designed using k-medoids clustering. *bioRxiv*.
- 734 Johnson, M.G., Gardner, E.M., Liu, Y., Medina, R., Goffinet, B., Shaw, A.J., Zerega, N.J.C.,  
735 Wickett, N.J., 2016. HybPiper: Extracting coding sequence and introns for phylogenetics from



- 736 High-throughput sequencing reads using target enrichment. *Appl. Plant Sci.* 4, 1600016.
- 737 Katoh, M., Kuma, M., 2002. MAFFT: a novel method for rapid multiple sequence alignment based  
738 on fast Fourier transform. *Nucleic Acids Res.* 30, 3059–3066.
- 739 Kent, W.J., 2002. BLAT — The BLAST-like alignment tool. *Genome Res.* 12, 656–664.
- 740 Kitazawa, M.S., Fujimoto, K., 2014. A developmental basis for stochasticity in floral organ numbers.  
741 *Front. Plant Sci.* 5, 1–14.
- 742 Langenheim, J.H., 2003. *Plant resins: chemistry, evolution, ecology, ethnobotany*, Book. Timber,  
743 Orlando.
- 744 Larsson, A., 2014. AliView: A fast and lightweight alignment viewer and editor for large datasets.  
745 *Bioinformatics* 30, 3276–3278.
- 746 Li, H., Durbin, R., 2010. Fast and accurate long-read alignment with Burrows-Wheeler transform.  
747 *Bioinformatics* 26, 589–595.
- 748 Li, H., Handsaker, B., Wysoker, A., Fennell, T., Ruan, J., Homer, N., Marth, G., Abecasis, G.,  
749 Durbin, R., 2009. The Sequence alignment/map (SAM) format and SAMtools. *Bioinformatics*  
750 25, 2078–2079.
- 751 Li, W., Godzik, A., 2006. Cd-hit: A fast program for clustering and comparing large sets of protein or  
752 nucleotide sequences. *Bioinformatics* 22, 1658–1659.
- 753 Liu, L., Yu, L., Pearl, D.K., Edwards, S. V., 2009. Estimating species phylogenies using coalescence  
754 times among sequences. *Syst. Biol.* 58, 468–477.
- 755 LPWG, 2017. A new subfamily classification of the Leguminosae based on a taxonomically  
756 comprehensive phylogeny. *Taxon* 66, 44–77.
- 757 Mackinder, B., 2001. Further systematic studies in *Berlinia* (Leguminosae, Caesalpinioideae,  
758 Detarieae sensu lato). *Syst. Geogr. Plants* 71, 433–441.
- 759 Mackinder, B., Harris, D., 2006. A synopsis of the genus *Berlinia* (Leguminosae-Caesalpinioideae).  
760 *Edinburgh J. Bot.* 63, 161–182.
- 761 Mackinder, B., Pennington, R., 2011. Monograph of *Berlinia* (Leguminosae). *Syst. Bot. Monogr.* 91,  
762 1–117.

- 763 Mackinder, B.A., Saslis-Lagoudakis, H., Wieringa, J.J., Devey, D., Forest, F., Bruneau, A., 2013.  
764 The tropical African legume *Scorodophloeus* clade includes two undescribed *Hymenostegia*  
765 segregate genera and *Micklethwaitia*, a rare, monospecific genus from Mozambique. South  
766 African J. Bot. 89, 156–163.
- 767 Maddison, W.P., Maddison, D.R., 2015. Mesquite: a modular system for evolutionary analysis.
- 768 Mandel, J.R., Dikow, R.B., Funk, V. a., Masalia, R.R., Staton, S.E., Kozik, A., Michelmore, R.W.,  
769 Rieseberg, L.H., Burke, J.M., 2014. A target enrichment method for gathering phylogenetic  
770 information from hundreds of loci: an example from the Compositae. Appl. Plant Sci. 2,  
771 1300085.
- 772 Mandel, J.R., Dikow, R.B., Funk, V.A., 2015. Using phylogenomics to resolve mega-families: An  
773 example from Compositae. J. Syst. Evol. 53, 391–402.
- 774 Mariac, C., Scarcelli, N., Pouzadou, J., Barnaud, A., Billot, C., Faye, A., Kougbéadjou, A., Maillol,  
775 V., Martin, G., Sabot, F., Santoni, S., Vigouroux, Y., Couvreur, T.L.P., 2014. Cost-effective  
776 enrichment hybridization capture of chloroplast genomes at deep multiplexing levels for  
777 population genetics and phylogeography studies. Mol. Ecol. Resour. 14, 1103–1113.
- 778 Matasci, N., Hung, L.-H., Yan, Z., Carpenter, E.J., Wickett, N.J., Mirarab, S., Nguyen, N., Warnow,  
779 T., Ayyampalayam, S., Barker, M., Burleigh, J.G., Gitzendanner, M.A., Wafula, E., Der, J.P.,  
780 DePamphilis, C.W., Roure, B., Philippe, H., Ruhfel, B.R., Miles, N.W., Graham, S.W.,  
781 Mathews, S., Surek, B., Melkonian, M., Soltis, D.E., Soltis, P.S., Rothfels, C., Pokorny, L.,  
782 Shaw, J.A., DeGironimo, L., Stevenson, D.W., Villarreal, J.C., Chen, T., Kutchan, T.M., Rolf,  
783 M., Baucom, R.S., Deyholos, M.K., Samudrala, R., Tian, Z., Wu, X., Sun, X., Zhang, Y., Wang,  
784 J., Leebens-Mack, J., Wong, G.K.-S., 2014. Data access for the 1,000 Plants (1KP) project.  
785 Gigascience 3, 1–10.
- 786 Miller, M.A., Pfeiffer, W., Schwartz, T., 2010. Creating the CIPRES Science Gateway for inference  
787 of large phylogenetic trees, in: 2010 Gateway Computing Environments Workshop, GCE 2010.
- 788 Mirarab, S., Nguyen, N., Guo, S., Wang, L.-S., Kim, J., Warnow, T., 2015. PASTA: Ultra-large  
789 multiple sequence alignment for nucleotide and amino-acid sequences. J. Comput. Biol. 22,  
790 377–386.

- 791 Mirarab, S., Warnow, T., 2015. ASTRAL-II: Coalescent-based species tree estimation with many  
792 hundreds of taxa and thousands of genes, in: Bioinformatics. pp. i44-152.
- 793 Mitchell, N., Lewis, P.O., Lemmon, E.M., Lemmon, A.R., Holsinger, K.E., 2017. Anchored  
794 phylogenomics improves the resolution of evolutionary relationships in the rapid radiation of  
795 protea L. *Am. J. Bot.* 104, 102–115.
- 796 Monniaux, M., Pieper, B., Hay, A., 2016. Stochastic variation in *Cardamine hirsuta* petal number.  
797 *Ann. Bot.* 117, 881–887.
- 798 Moore, A., de Vos, J.M., Hancock, L.P., Goolsby, E., Edwards, E.J., 2018. Targeted enrichment of  
799 large gene families for phylogenetic inference: phylogeny and molecular evolution of  
800 photosynthesis genes in the *Portullugo* (Caryophyllales). *Syst. Biol.* 67, 367–383.
- 801 Nicholls, J.A., Pennington, R.T., Koenen, E.J.M., Hughes, C.E., Hearn, J., Bunnefeld, L., Dexter,  
802 K.G., Stone, G.N., Kidner, C.A., 2015. Using targeted enrichment of nuclear genes to increase  
803 phylogenetic resolution in the neotropical rain forest genus *Inga* (Leguminosae: Mimosoideae).  
804 *Front. Plant Sci.* 6, 710.
- 805 Ogutcen, E., Ramsay, L., von Wetterberg, E., Bett, K., 2018. Capturing variation in *Lens* (Fabaceae):  
806 Development and utility of an exome capture array for lentil. *Appl. Plant Sci.* 6, e1165.
- 807 Ojeda, D.I., Jaén-Molina, R., Santos-Guerra, A., Caujape-Castells, J., Cronk, Q., 2017. Temporal, but  
808 not spatial, changes in expression patterns of petal identity genes are associated with loss of  
809 papillate conical cells and the shift to bird pollination in Macaronesian *Lotus* (Leguminosae).  
810 *Plant Biol.* 19.
- 811 Ojeda, I., Francisco-Ortega, J., Cronk, Q.C.B., 2009. Evolution of petal epidermal micromorphology  
812 in Leguminosae and its use as a marker of petal identity. *Ann. Bot.* 104, 1099–1110.
- 813 Ojeda, I., Santos-Guerra, A., Oliva-Tejera, F., Jaén-Molina, R., Caujapé-Castilles, J. Marrero, A.,  
814 Cronk, Q.C.B., 2012. Comparative micromorphology of petals in Macaronesian *Lotus*  
815 (Leguminosae) reveals a loss of papillose conical cells during the evolution of bird pollination.  
816 *Int. J. Plant Sci.* 173, 365–374.
- 817 Oldeman, R., 1964. Revision of *Didelitia* Baill. (Caesalpiniaceae). *Blumea* 12, 209–239.
- 818 Pagel, M., Meade, A., 2006. Bayesian analysis of correlated evolution of discrete characters by

- 819 reversible-jump Markov chain .... Am. Nat. 167, 808 – 825.
- 820 Pennington, R.T., Cronk, Q.C.B., Citerne, H.L., 2006. An apparent reversal in floral symmetry in the  
821 legume *Cadia* is a homeotic transformation. Proc. Natl. Acad. Sci. United States Am. 103,  
822 12017–12020.
- 823 Price, M.N., Dehal, P.S., Arkin, A.P., 2009. Fasttree: Computing large minimum evolution trees with  
824 profiles instead of a distance matrix. Mol. Biol. Evol. 26, 1641–1650.
- 825 Quinlan, A.R., Hall, I.M., 2010. BEDTools: A flexible suite of utilities for comparing genomic  
826 features. Bioinformatics 26, 841–842.
- 827 Rambaut, A., 2016. FigTree ver. 1.4.3.
- 828 Rambaut, A., Drummond, A.J., Xie, D., Baele, G., Suchard, M.A., 2018. Posterior summarisation in  
829 Bayesian phylogenetics using Tracer 1.7. Syst. Biol. 0, 1–5.
- 830 Rohland, N., Reich, D., 2012. Cost-effective, high-throughput DNA sequencing libraries for  
831 multiplexed target capture. Genome Res. 22, 939–946.
- 832 Ronquist, F., Huelsenbeck, J.P., 2003. MRBAYES 3: Bayesian phylogenetic inference under mixed  
833 models. Bioinformatics 19, 1572–1574.
- 834 Ronse De Craene, L., 2015. Meristic changes in flowering plants: How flowers play with numbers.  
835 Flora Morphol. Distrib. Funct. Ecol. Plants 221, 22–37.
- 836 Ryan, C.M., Pritchard, R., McNicol, I., Owen, M., Fisher, J.A., Lehmann, C., 2016. Ecosystem  
837 services from Southern African woodlands and their future under global change Citation for  
838 published version: Ecosystem services from southern African woodlands and their future under  
839 global change. Philos. Trans. R. Soc. B Biol. Sci. 371, 20150312.
- 840 Sayyari, E., Mirarab, S., 2016. Fast coalescent-based computation of local branch support from  
841 quartet frequencies. Mol. Biol. Evol. 33, 1654–1668.
- 842 Schmickl, R., Liston, A., Zeisek, V., Oberlander, K., Weitemier, K., Straub, S.C.K., Cronn, R.C.,  
843 Dreyer, L.L., Suda, J., 2016. Phylogenetic marker development for target enrichment from  
844 transcriptome and genome skim data: the pipeline and its application in southern African *Oxalis*  
845 (*Oxalidaceae*). Mol. Ecol. Resour. 16, 1224–1135.

- 846 Simão, F.A., Waterhouse, R.M., Ioannidis, P., Kriventseva, E.V., Zdobnov, E.M., 2015. BUSCO:  
847 assessing genome assembly and annotation completeness with single-copy orthologs.  
848 *Bioinformatics* 31, 3210–3212.
- 849 Smit, A.F.A., Hubley, R., Green, P., 2015. RepeatMasker.
- 850 Smith, S.A., Moore, M.J., Brown, J.W., Yang, Y., 2015. Analysis of phylogenomic datasets reveals  
851 conflict, concordance, and gene duplications with examples from animals and plants. *BMC*  
852 *Evol. Biol.* 15, 150.
- 853 Stamatakis, A., 2014. RAxML version 8: a tool for phylogenetic analysis and post-analysis of large  
854 phylogenies. *Bioinformatics* 30, 1312–1313.
- 855 Tucker, S., 2003. Floral development in legumes. *Plant Physiol.* 131, 911–926.
- 856 Tucker, S., 2002a. Comparative floral ontogeny in Detarioideae Leguminosae Caesalpinioideae 1.  
857 Radially symmetrical taxa lacking organ suppression. *Am. J. Bot.* 89, 875–887.
- 858 Tucker, S., 2002b. Comparative floral ontogeny in Detarioideae (Leguminosae: Caesalpinioideae). 2.  
859 Zygomorphic taxa with petal and stamen suppression. *Am. J. Bot.* 89, 888–907.
- 860 Tucker, S., 2000. Evolutionary loss of petals and/or petals in Detarioideae legume taxa *Aphanocalyx*,  
861 *Brachystegia*, and *Monopetalanthus* (Leguminosae: Caesalpinioideae). *Am. J. Bot.* 87, 608–624.
- 862 van der Burgt, X., 2016. *Didelotia korupensis* and *Tessmannia korupensis* (Leguminosae,  
863 Caesalpinioideae), two new tree species from Korup National Park in Cameroon. *Blumea* 61,  
864 51–58.
- 865 van der Burgt, X., Eyakwe, M., Newberry, D., 2007. *Englerodendron korupense* (Fabaceae,  
866 Caesalpinioideae), a new tree species from Korup National Park, Cameroon. *Adansonia* 29, 59–  
867 65.
- 868 Van Dongen, S., 2000. A cluster algorithm for graphs. PhD Thesis. University of Utrecht.
- 869 Vatanparast, M., Powell, A., Doyle, J., Egan, A., 2018. Targeting legume loci: a comparison of three  
870 methods for target enrichment bait design in Leguminosae phylogenomics. *Appl. Plant Sci.* 6,  
871 e1036.
- 872 Villaverde, T., Pokorny, L., Olsson, S., Rincon-Barrado, M., Johnson, M., Gardner, E., Wickett, N.,

- 873 Molero, J., Riina, R., Sanmartin, I., 2018. Bridging the micro□ and macroevolutionary levels in  
874 phylogenomics: Hyb□Seq solves relationships from populations to species and above. *New*  
875 *Phytol.* 220, 636–650.
- 876 Wang, J., Wang, Y., Luo, D., 2010. LjCYC genes constitute floral dorsoventral asymmetry in *Lotus*  
877 *japonicus*. *J. Integr. Plant Biol.* 52, 959–70.
- 878 Wang, L., Xu, S., Yang, J., Weng, L., Wang, Z., Luo, Y., Li, X., Sato, S., Tabata, S., Ambrose, M.,  
879 Rameau, C., Feng, X., Hu, X., Luo, D., 2008. Genetic control of floral zygomorphy in pea  
880 (*Pisum sativum* L.). *Proc. Natl. Acad. Sci. U. S. A.* 105, 10414–10419.
- 881 Weng, L., Zhaoxia, T., Feng, X., Li, X., Xu, S., Hu, X., Luo, D., Yang, J., 2011. Petal development  
882 in *Lotus japonicus*. *J. Integr. Plant Biol.* 53, 770–782.
- 883 Wieringa, J., 1999. Monopetalanthus exit. □: a systematic study of *Aphanocalyx*, *Bikinia*, *Icuria*,  
884 *Michelsonia* and *Tetraberlinia* (Leguminosae, Casalpinoideae). van de Wageningen  
885 Universitet.
- 886 Wilczek, R., Léonard, J., Hauman, L., Hoyle, A.C., Steyaert, R., Gilbert, G., Boutique, R., 1952.  
887 Flore du Congo Belge et du Ruanda-Urundi: Caesalpiniaceae vol. 3. Publications de l’Institut  
888 National Pour l’étude Agronomique du Congo Belge.
- 889 Woollacott, C., Cronk, Q., 2018. The hooded mutant of *Lathyrus odoratus* (Fabaceae) is associated  
890 with a cycloidea gene mutation. *Botany* 96, 47–55.
- 891 Xu, S., Luo, Y., Cai, Z., Cao, X., Hu, X., Yang, J., Luo, D., 2013. Functional diversity of  
892 CYCLOIDEA-like TCP genes in the control of zygomorphic flower development in *Lotus*  
893 *japonicus*. *J. Integr. Plant Biol.* 55, 221–231.
- 894 Yang, Y., Smith, S.A., 2014. Orthology inference in nonmodel organisms using transcriptomes and  
895 low-coverage genomes: Improving accuracy and matrix occupancy for phylogenomics. *Mol.*  
896 *Biol. Evol.* 31, 3081–3092.
- 897 Zhuang, L., Ambrose, M., Rameau, C., Weng, L., Yang, J., Hu, X., Luo, D., Li, X., 2012.  
898 LATHYROIDES, encoding a WUSCHEL-related Homeobox1 transcription factor, controls  
899 organ lateral growth, and regulates tendril and dorsal petal identities in garden pea (*Pisum*  
900 *sativum* L.). *Mol. Plant* 5, 1333–1345.

901 Zimmerman, E., Herendeen, P.S., Lewis, G.P., Bruneau, A., 2017. Floral evolution and phylogeny of  
902 the dialioideae, a diverse subfamily of tropical legumes. *Am. J. Bot.* 104, 1019–1041.

903

## 904 **Figures**

905 **Fig. 1.** Phylogenetic reconstruction of the *Berlinia* clade obtained from individual and concatenated  
906 analyses using ML and Bayesian inference. The arrow indicates the location of the ancestral state  
907 reconstruction within the focal group (*Anthonotha* clade). Flower diversity in the genera sampled in  
908 the *Berlinia* clade: (A) *Gilbertiodendron obliquum* (Jongkind 9972), (B) *Didelotia africana*  
909 (XvdB\_3), (C) *Oddoniodendron micranthum* (Bidault\_MBG), (D) *Berlinia grandiflora* (FOLI092H),  
910 (E) *Englerodendron korupense* (XvdB\_741-8), (F) *Isomacrolobium* aff. *tripolisomere*  
911 (Bidault\_2214\_EB\_3234), (G) *Anthonotha macrophylla* (Bidault\_1246\_EB\_9850), and (H)  
912 schematic representation of the flower in the ancestral state (*A. macrophylla*). Petal types (identity  
913 based on their position within the dorsoventral axis within the flower) are in color blue (adaxial petal)  
914 and in green (lateral and abaxial petals). Stamens are indicated in yellow and staminodes in black. \* =  
915 Nodes with < 85 bootstrap support obtained from the concatenated and individual RAxML analyses.  
916 Drawing modified from fig. 15 in Breteler (2010: 84). Copyright Meise Botanic Garden and Royal  
917 Botanical Society of Belgium. Photo credits: (A) Carel Jongkind, (C, F, G) Ehoarn Bidault, (D)  
918 Olivier Hardy, (B, E) Xander van der Burgt.

919

920 **Fig. 2.** Schematic representation of the various modifications in petal types (A) and the number of  
921 petals (B) from the ancestral state reconstructed in the *Anthonotha* clade. Next to the arrows is  
922 indicated the type of transition and the number of independent transitions. Ada = adaxial petal, Lat =  
923 lateral petal, Aba = abaxial petal. Petal types (identity based on their position within the dorsoventral  
924 axis within the flower) are colored blue (adaxial), green (lateral) and orange (abaxial). Stamens are  
925 indicated in yellow and staminodes in black. Drawings modified fig. 3A2 in Breteler (2008: 141), fig.  
926 15 in Breteler (2010: 84). Copyright Meise Botanic Garden and Royal Botanical Society of Belgium.

927

928 **Fig. 3.** Schematic representation of the transitions in petal types from the ancestral state in the  
929 *Anthonotha* clade. Different colors represent petal identity (ID) based on their location along the  
930 dorsoventral axis within the flower and on their morphology on the corresponding diagrams: blue  
931 adaxial identity, green lateral identity and orange abaxial identity. Drawings modified from fig. 3A2

932 in Breteler (2008: 141), fig. 15 in Breteler (2010: 84), Fig. 4H, 17D, fig. 19B, fig. 22 in Breteler  
933 (2011:68, 75, 76, 78). Copyright Meise Botanic Garden and Royal Botanical Society of Belgium.

934

935 **Fig. 4.** Distribution of epidermal types along the dorsoventral axis of symmetry within the flower.  
936 (A) Flower of *Englerodendron korupense* (XvdB\_741\_8) with all petals with similar petal  
937 macromorphology (one petal type), (B) schematic representation of *E. usambarensis* indicating the  
938 location of adaxial, lateral and abaxial petals, (C-E) papillose conical cells (PCS) in a specimen of *E.*  
939 *conchylophorum* (Michelson 1060) on three different petals selected based on their location in the  
940 flower. (F) Flower of *Anthonotha xanderi* (XvdB\_279) with one large petal (adaxial) and lateral and  
941 abaxial petals of similar sizes (arrows), (G) schematic representation of *A. xanderi* with the identity  
942 of their petals based on their location. (H-I) papillose knobby rugose (PKR) cells observed in  
943 *Anthonotha noldeae* (Carvahlo 6946) on the two types of petals based on morphology. All scale bars  
944 10  $\mu\text{m}$ . Drawings modified from fig. 3A2 in Breteler (2008: 141), fig. 15 in Breteler (2010: 84).  
945 Copyright Meise Botanic Garden and Royal Botanical Society of Belgium. Photo credits: (A) Xander  
946 van der Burgt and (F) Ehoarn Bidault.

947

## 948 **Tables**

949 **Table 1.** List of the four floral traits studied and the scoring for the genera sampled of the Berlinia  
950 clade.

951 **Table 2.** Number of independent transitions inferred from the ancestral condition in the Anthonotha  
952 clade.

953

## 954 **Supporting Information**

955

## 956 **Figures**

957 **Fig. S1.** Capture success of the baits on the 61 samples after mapping with the 1021 exons reference.

958 **Fig. S2.** Best tree recovered with RAxML on the concatenated matrix using 200 bootstrap replicates.

959 **Fig. S3.** Best tree recovered with MrBayes on the individual clusters with the Bayesian support.

960 **Fig. S4.** Best tree recovered with RAxML on individual clusters (orthologues) using 200 bootstrap  
961 replicates.

962 **Fig. S5.** ASTRAL species tree inference based on the ML inferred individual genes (clusters)

963 obtained with RAxML and fast 200 bootstrap support. (A) Using the longest 247 rooted trees (B) and



964 using all 661 rooted trees. Branch support is indicated above each branch. Red represent the  
965 *Anthonotha* ss clad and blue *Englerodendron*, *Isomacrolobium* and *Pseudomacrolobium*.

966 **Fig. S6.** STAR species tree inference using the ML inferred individual genes (clusters) obtained with  
967 RAxML and 200 fast bootstrap support. (A) Using the 247 more complete rooted trees and with (B)  
968 including all 661 rooted trees. Red represent the *Anthonotha* ss clad and blue *Englerodendron*,  
969 *Isomacrolobium* and *Pseudomacrolobium*.

970 **Fig. S7.** ASTRAL-II tree of the *Anthonotha* clade with summary of conflict and concordant gene  
971 trees with (A) including all branches in the analysis and (B) including only branches with high  
972 support (70%). Pie chart color coding: blue: fraction of gene trees supporting the shown split; green:  
973 fraction of gene trees supporting the second most common split; red: fraction of gene trees supporting  
974 all other alternative partitions; gray: fraction of gene trees with no information (missing or  
975 unresolved).

976 **Fig. S8.** RAxML concatenated tree of the *Anthonotha* clade with summary of conflict and concordant  
977 gene trees with (A) including all branches in the analysis and (B) including only branches with high  
978 support (70%). Pie chart color coding: blue: fraction of gene trees supporting the shown split; green:  
979 fraction of gene trees supporting the second most common split; red: fraction of gene trees supporting  
980 all other alternative partitions; gray: fraction of gene trees with no information (missing or  
981 unresolved).

982 **Fig. S9.** Ancestral state reconstruction of flower symmetry, petal numbers, intraspecific stamen  
983 variation, no. of stamens, no. of staminodes, petal types and no. of petals with maximum likelihood.

984 **Fig. S10.** Level of differentiation on papillose conical cells (PCS) on species with actinomorphic  
985 flowers in *Englerodendron*. (A) *E. korupense* (*van der Burgt 741*) with smaller petals and less  
986 differentiated PCS cells (B-E). (F) *E. conchylophlorum* (*Michelson 1060*) with larger petals (and  
987 more area exposed) with PCS showing a higher level of differentiation (G-J). All scale bars 10  $\mu$ m.  
988 Drawings modified from fig. 3A2 in Breteler (2008: 141), fig. 15 in Breteler (2010: 84). Copyright  
989 Meise Botanic Garden and Royal Botanical Society of Belgium.

990

## 991 **Tables**

992 **Table S1.** Assembly metrics from the four transcriptomes used to generate the Detarioideae bait.

993 **Table S2.** Voucher specimens and location of the species included in the analyses.

994 **Table S3.** Matrix of the character states used in the ancestral reconstruction in the *Berlinia* clade.

995 **Table S4.** Voucher specimens of species used in the analysis of petal micromorphology. All  
996 specimens collected from Meise herbarium. Epidermal types identified in the species analyzed. PCS  
997 = papillose conical cells with striations, PKR = papillose knobby rugose cells, <sup>t</sup> = presence of  
998 trichomes.

999 **Table S5.** Statistics of the capture for the samples included in this study.

1000 **Table S6.** Supermatrix dimension, statistics of the number of orthologues and percentage of success  
1001 for the species included in the study.

1002

1003 **Table 1**

| Floral trait          | State 0     | State 1       | State 2    | State 3 |
|-----------------------|-------------|---------------|------------|---------|
| 1. Flower symmetry    | Zygomorphic | Actinomorphic |            |         |
| 2. Petal number       | 6 petals    | 5 petals      | 1-4 petals | Absent  |
| 3. No. of petal types | 1 type      | 2 types       | 3 types    |         |
| 4. Petal merism       | Variable    | Invariable    |            |         |
| 5. Fertile stamens    | > 3         | 3             | < 3        |         |
| 6. No. of staminoids  | > 6         | 6             | < 6        |         |
| 7. Stamen merism      | Variable    | Invariable    |            |         |

1004

1005

1006

1007

1008

1009

1010

1011

1012

1013

1014

1015

1016

1017 **Table 2**

| <b>Trait</b>    | <b>Modification</b>                   | <b>Frequency</b> |
|-----------------|---------------------------------------|------------------|
| Flower symmetry | Actinomorphy                          | 3                |
| Petal           | Reduction of number                   | 6                |
|                 | Increase of number                    | 1                |
|                 | Reduction of petal types              | 4                |
|                 | Increase of petal types               | 3                |
|                 | Intraspecific petal number variation  | 4                |
| Stamen          | Increase of number                    | 1                |
|                 | Reduction of number                   | 4                |
|                 | Intraspecific stamen number variation | 3                |
| Staminoid       | Reduction of number                   | 6                |

1018

1019

**(A)**  
*Gilbertiodendron*  
Zygomorphic

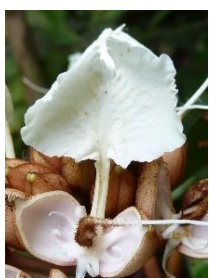

**(B)**  
*Didelotia*  
Zygomorphic

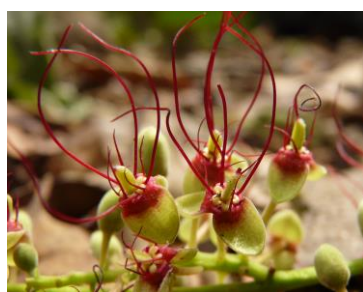

**(C)**  
*Odoniodendron*  
Actinomorphic

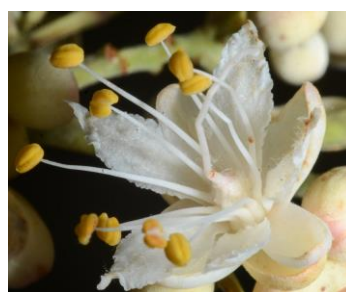

**(D)**  
*Berlinia*  
Zygomorphic

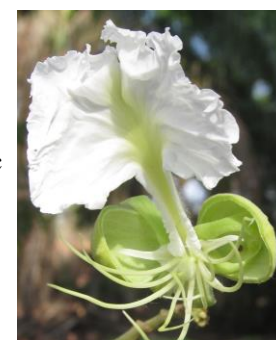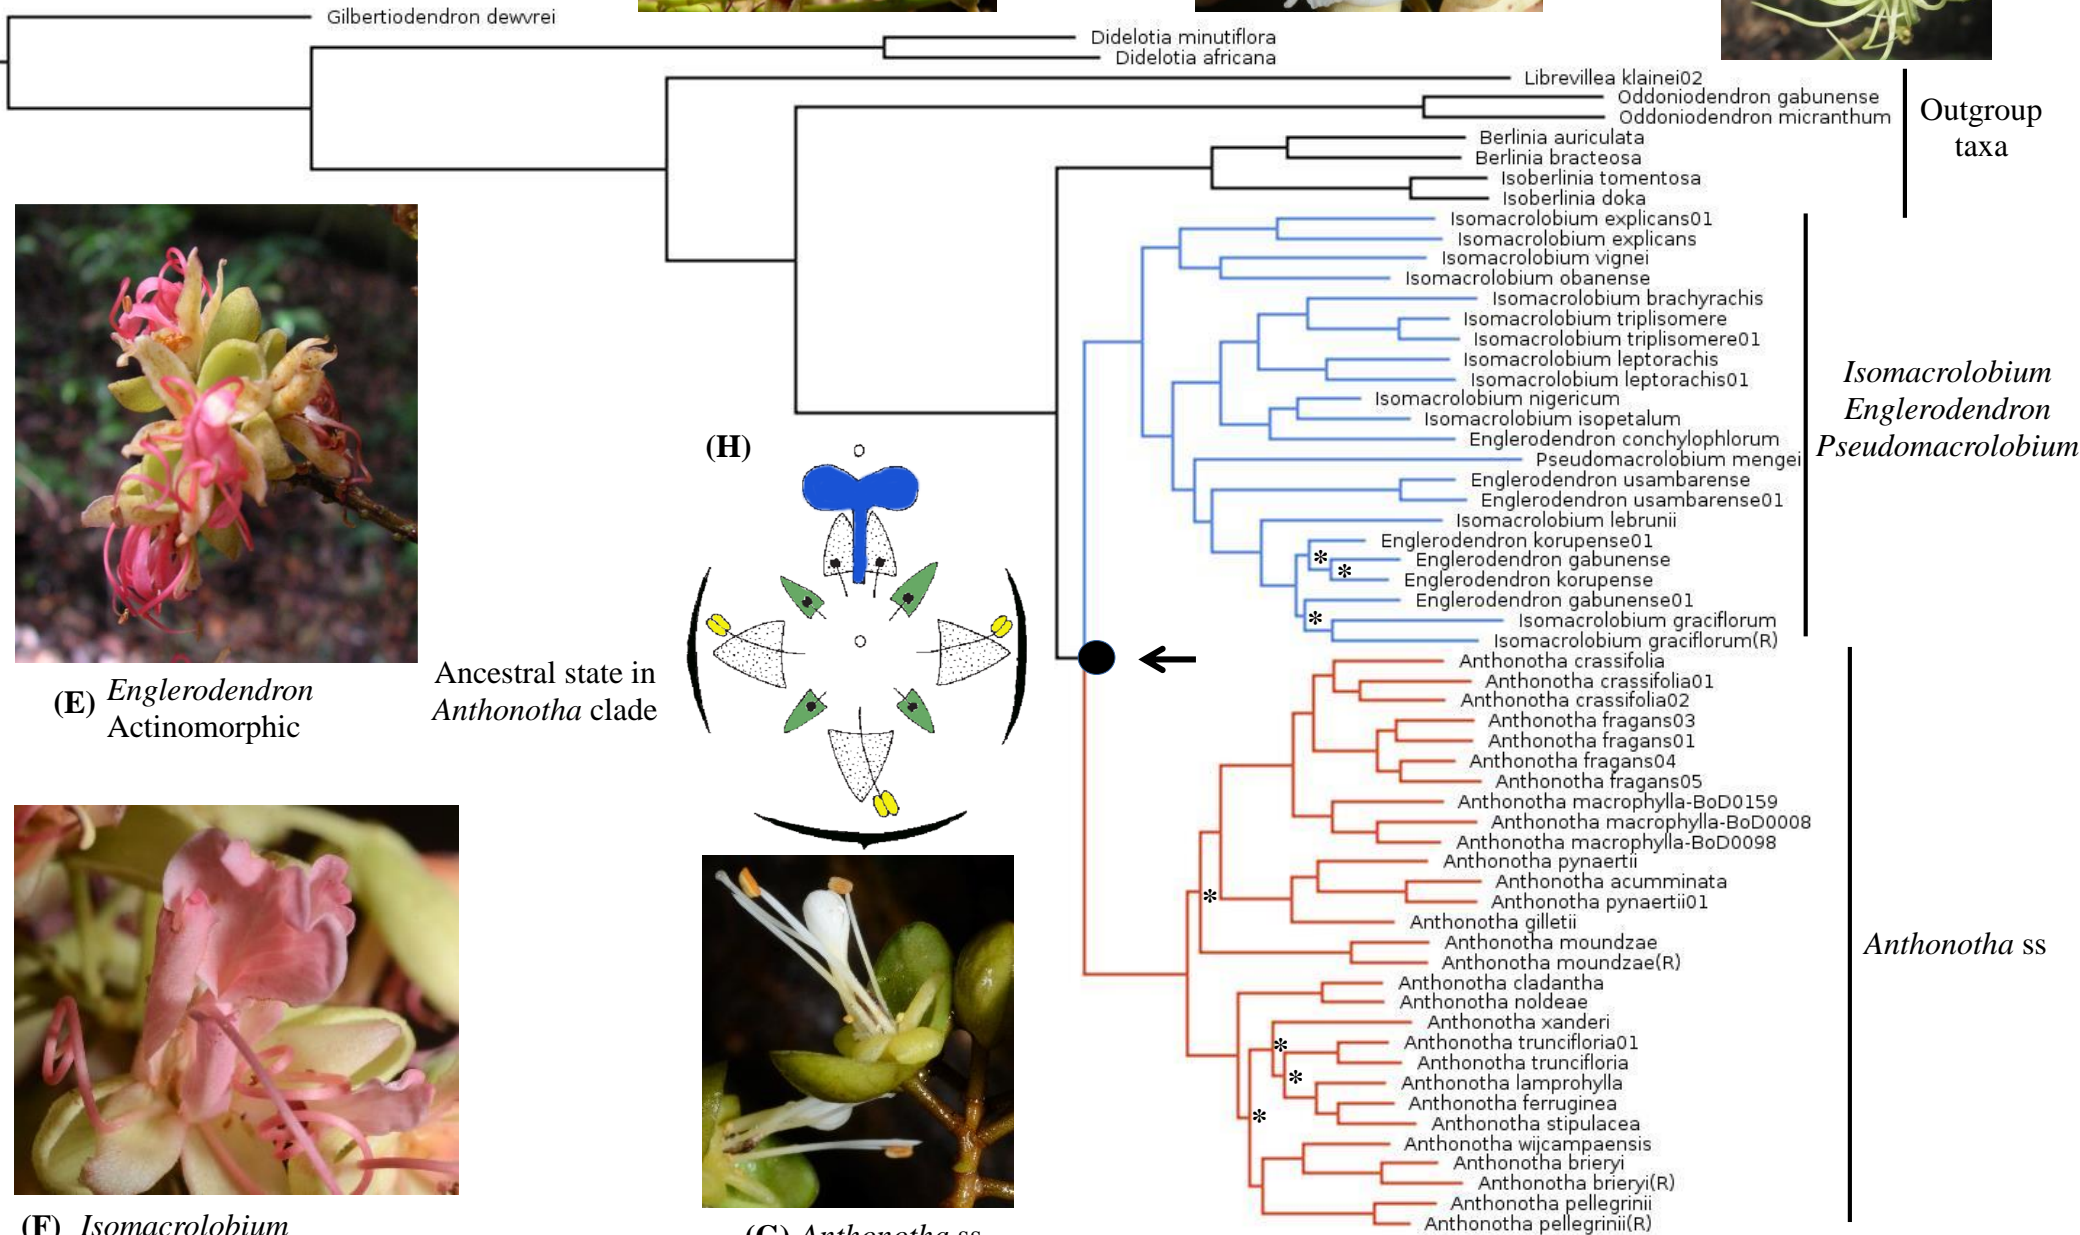

Outgroup taxa

*Isomacrolobium*  
*Englerodendron*  
*Pseudomacrolobium*

*Anthonotha* ss

(A)

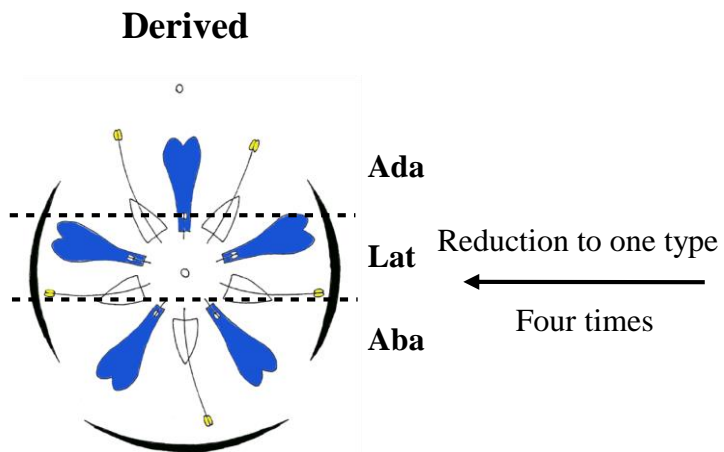

**Ancestral**

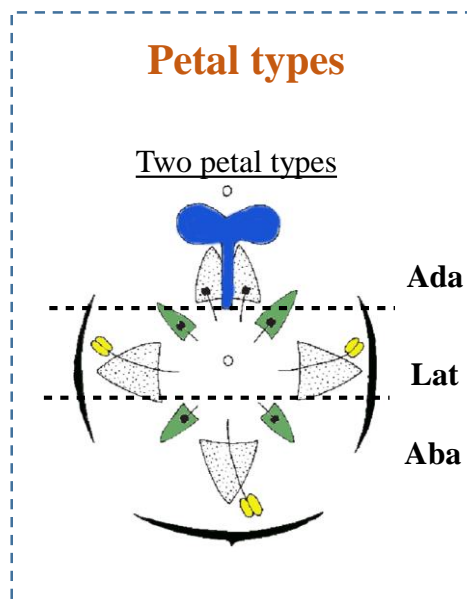

→ Increase to three types  
Three times

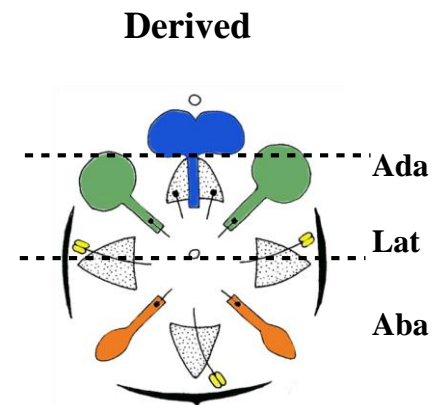

(B)

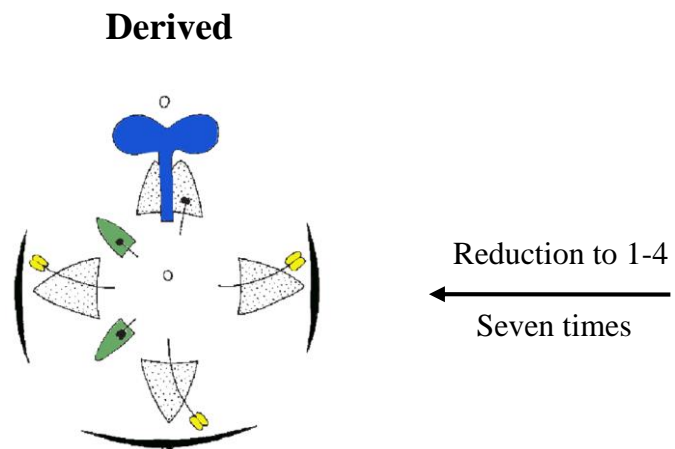

**Ancestral**

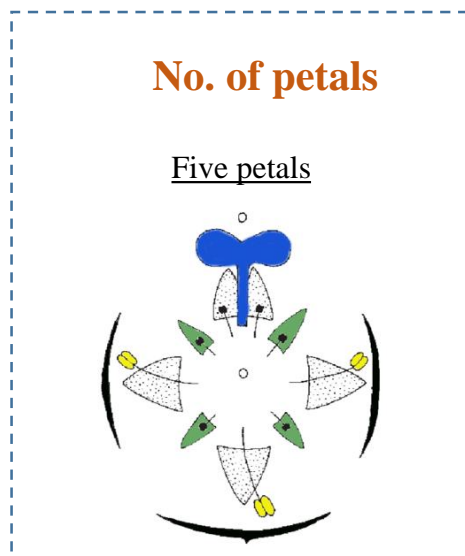

→ Increase to 6  
Once

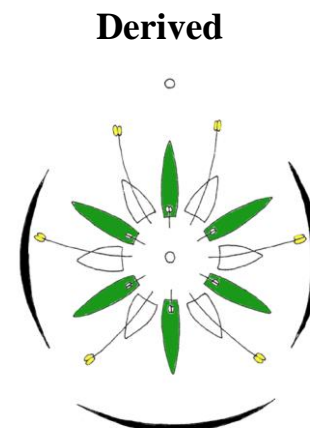

**(A)****Derived**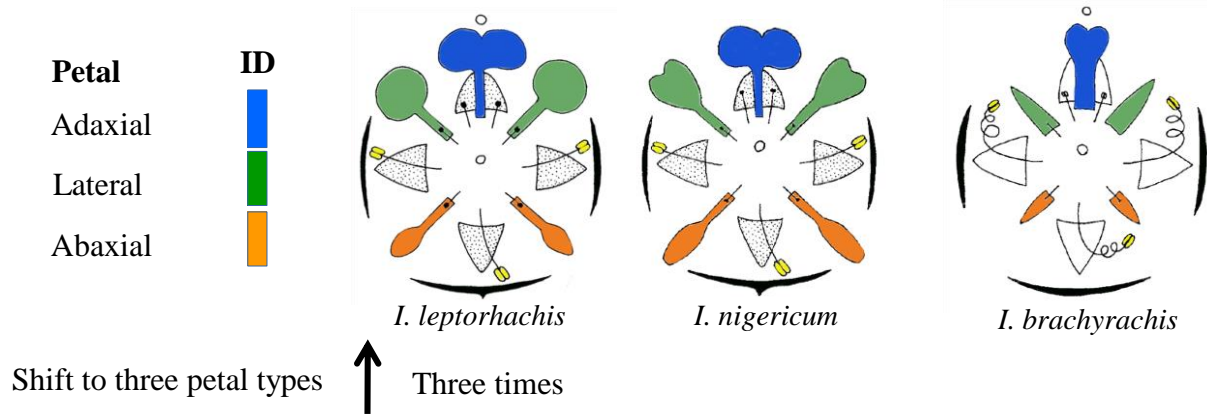**Ancestral**Two petals types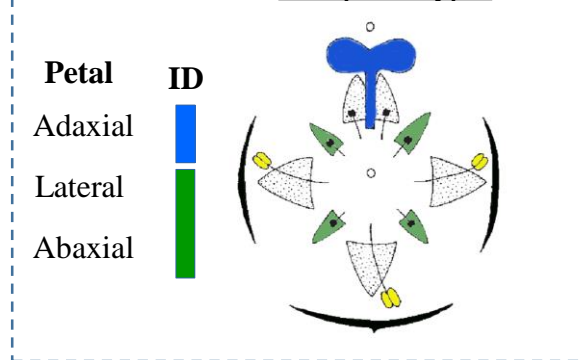Shift to an alternative  
arrangement of two petal types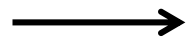

Three times

**(B)****Derived**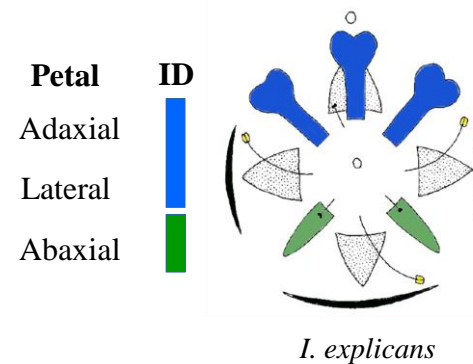Shift to one petal type  
↓ Four times  
**(C)****Derived**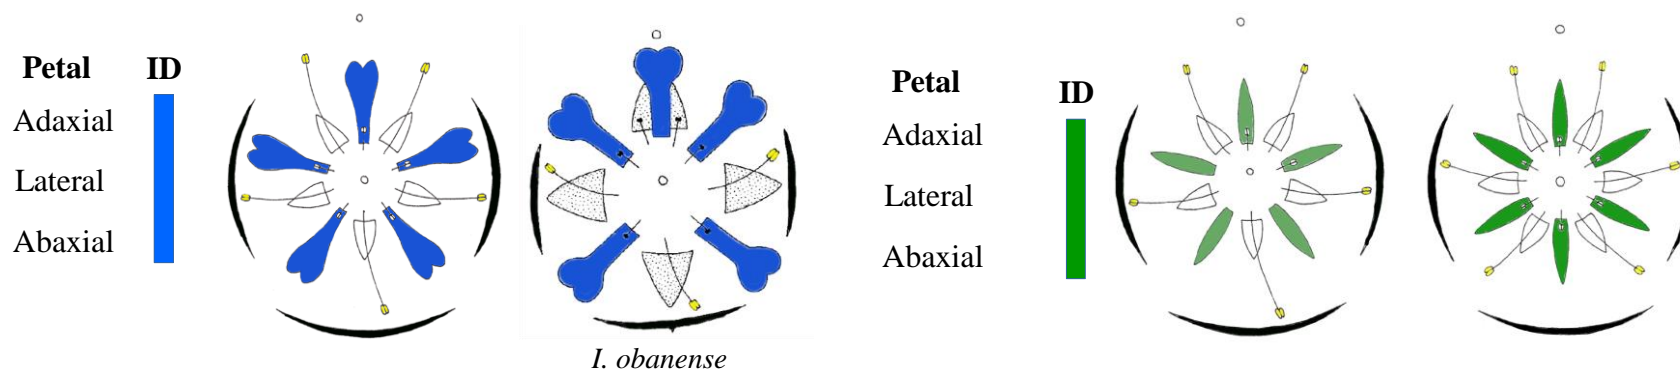

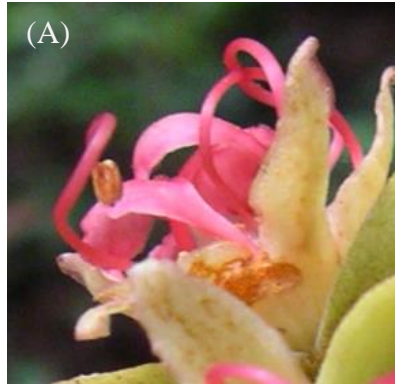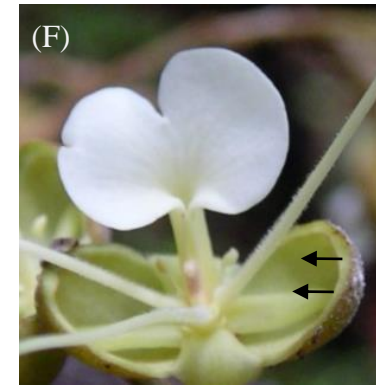

Petal identity based on location within the dorsoventral axis of the flower

PCS

PKR

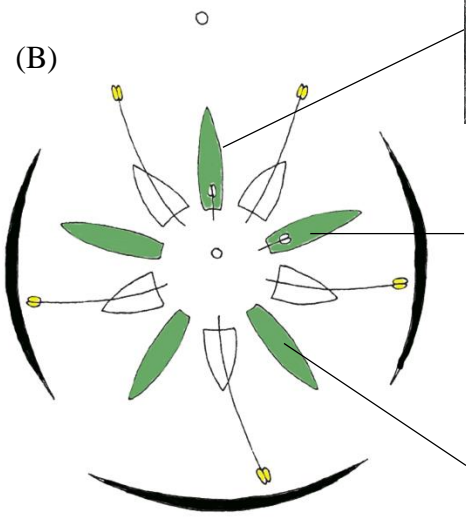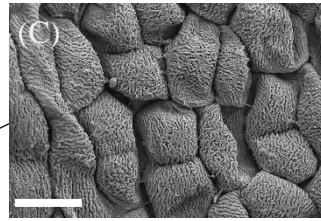

Adaxial

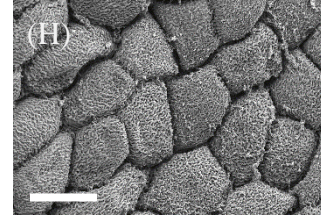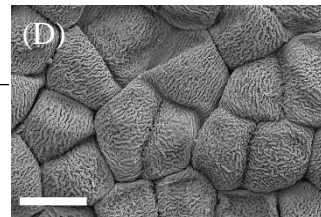

Lateral

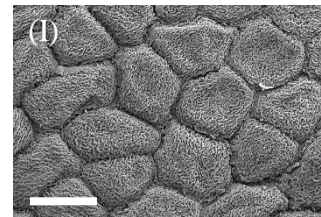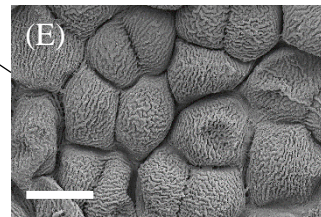

Abaxial

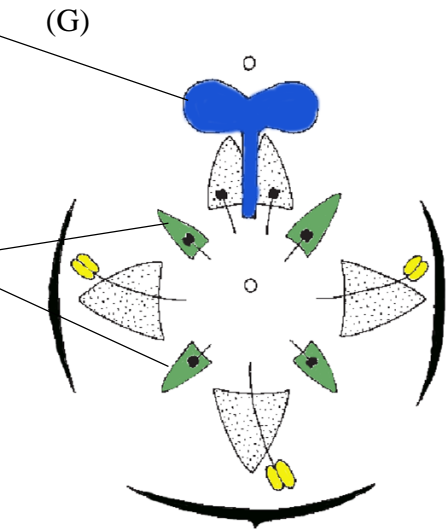

Actinomorphic flowers

Zygomorphic flowers
