# Supplementary material for: Phylogenomics within the Anthonotha clade (Detarioideae, Leguminosae) reveals a high diversity in floral trait shifts and a general trend towards organ number reduction
Source: bioRxiv or medRxiv preprint supplement (doi:10.1101/511949), 2019-01-04

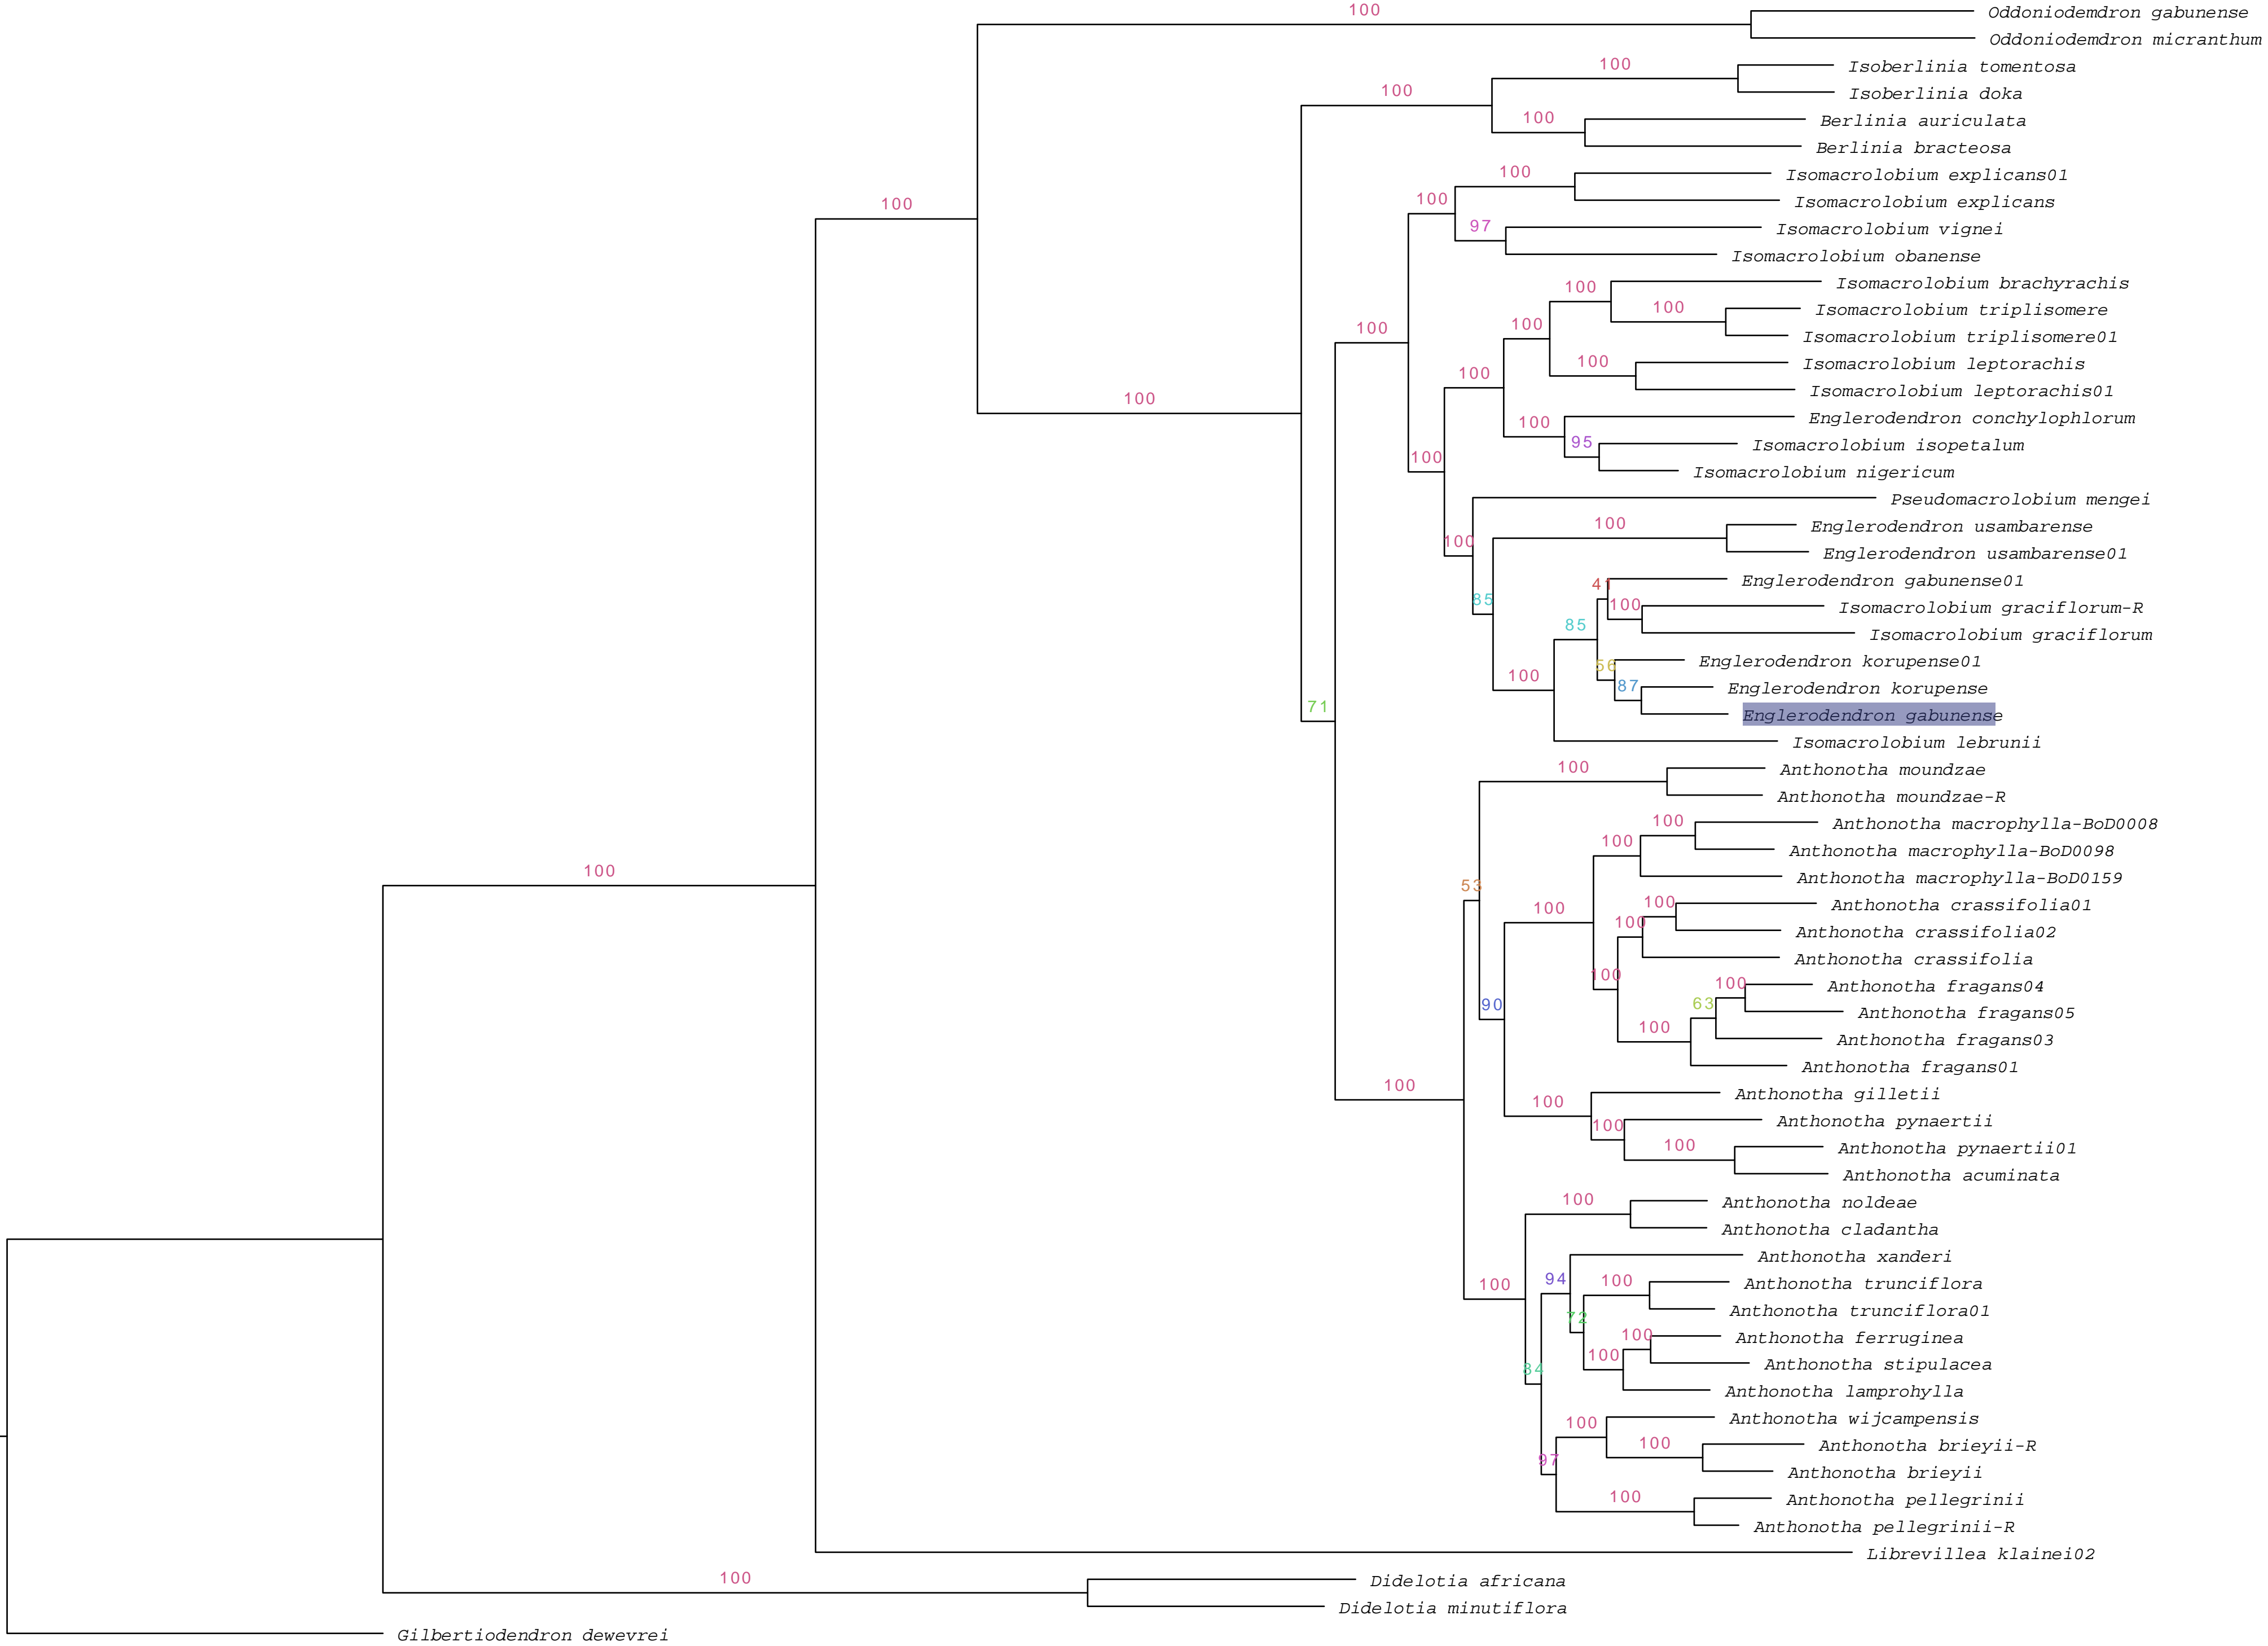

Supplement: Supplementary file [file media-2.pdf]
